# Supplementary material for: Multiple CRF01_AE/CRF07_BC Recombinants Enhanced the HIV-1 Epidemic Complexity Among MSM in Shenyang City, Northeast China
Source: Front Microbiol. 2022 May 12;13:855049. doi: 10.3389/fmicb.2022.855049 (PMC9133626; doi:10.3389/fmicb.2022.855049)
Supplement: Supplementary file 1 [file Table_1.XLSX]

## Sheet: Sheet1
>302680_160510_URF_0107
TGGCAACGACCCCTCGTCACAGTAAAAGTAGGAGGACAGATGAAAGAAGCTCTATTAGATACAGGAGCAGATGATACAGTATTAGAAGATATAGATTTGCCAGGAAAATGGAAACCAAAAATGATAGGGGGAATTGGAGGTTTTATCAAGGTAAGGCAATACGATCAGATACTTATAGAAATTTGTGGAAAAAAGGCTATAGGTACAGTGTTAGTAGGACCTACACCTGTCAACATAATTGGACGAAATATGTTGACTCGGATTGGTTGTACTTTAAATTTCCCAATTAGCCCTATTGACACTGTACCAGTAAAACTAAAGCCAGGAATGGATGGCCCAAAGGTTAAACAATGGCCATTGACAAAAGAGAAAATAGAAGCATTAACTGCAATTTGTGAG…
>121907_171221_URF_0107
TGGCAACGACCCCTTGTCACAGTAAAGATAGGAGGACAGATGAAAGAAGCTCTGTTAGATACAGGAGCAGATGATACAGTATTAGAAGATATAAATTTGCCAGGAAAATGGAAACCAAAAATGATAGGGGGAATTGGAGGTTTTATCAAGGTAAAACAATATGATCAGATACTTATAGAAATTTGTGGRAAAAAAGCTATAGGTACAGTGTTAGTAGGACCTACACCTRTCAACATAATTGGACGAAATATGTTGACTCAGATTGGTTGTACTTTAAATTTYCCAATTAGYCCTATTGACACTGTACCAGTAAMAYTAAAGCCAGGAATGGATGGCCCAAAGGTTAGACAATGGCCATTGACAAAAGAAAAAATAGAAGCATTAACAGCAATTTGTGAT…
>062614_180628_URF_0107
TGGCAACGACCCCTTGTCACAATAAAAATAGGAGGACAGCTAAGAGAAGCTCTATTAGATACAGGAGCAGATGATACAGTATTAGAAGAGATAAATTTGCCAGGAAAATGGAAACCAAAAATGATAGGGGGAATTGGAGGTTTTATCAAGGTAAGGCAATATGATCAGATACTTATAGAAATTTGTGGAAAAAAGGCTATAGGTACAGTATTAGTAGGACCTACACCTGTCAACATAATTGGACGAAATATGTTGACTCAGCTTGGTTGTACTTTAAATTTYCCAATTAGTCCTATTGACACTGTACCAGTAACATTRAAGCCAGGAATGGATGGMCCAAAGGTTAAACAATGGCCATTGACAAAAGAGAAAATAGAAGCATTAACAGCAATTTGTGAT…
>100938_181011_URF_0107
TGGCAACGACCCGTTGTCACAGTAAGAATAGAAGGACAGCTGAAAGAAGCTCTATTAGATACAGGGGCAGATGATACAGTATTAGAAGATATAAATTTGCCAGGAAAATGGAAGCCAAAAATGATAGGGGGAATTGGAGGTTTTATCAAAGTTAGGCAATATGATCAGATAGTTATAGAAATTTGTGGAAAAAGGGCTATAGGTACAGTGTTARTAGGACCTACACCTGTCAACATAATTGGACGAAATATGTTGACTCAGATTGGTTGTACTTTAAATTTTCCAATTAGCCCTATTGACACTGTACCAGTAACATTAAAGCCAGGAATGGATGGCCCAAAGGTTAAACAATGGCCATTGACAAAAGAAAAAATAGAAGCATTAAAAGCAATTTGTGAT…
>112002_181122_URF_0107
TGGCAACGACCYGTAGTCACAGTAAGAATAGAAGGACAGCTGAAAGAAGCTCTATTAGATACAGGAGCAGATGATACAGTATTAGAAGATATAAATTTGCCAGGAAAATGGAAACCAAAAATGATAGGGGGAATTGGAGGGTTTATCAAAGTAAGGCARTATGATCAGATACTTATAGAAATTTGTGGGAAAAAAGCTATAGGTACAGTATTAGTAGGACCTACACCTGTCAACATAATTGGAAGAAATCTGTTGACTCAGATTGGTTGTACTTTAAATTTTCCRATCAGTCCTATTGAAACTGTACCAGTAAAACTAAAGCCAGGAATGGATGGTCCAAAGGTTAAACAATGGCCATTGACAAAAGAGAAAATAGAAGCATTAACARCAATTTGTGAT…
>121812_181220_URF_0107
TGGCAACGACCCCTTGTCACAGTAAAAATAGAAGGACAACTGAGAGAAGCTCTATTAGATACAGGAGCAGATGATACAGTATTAGAAGATATAAATTTGCCAGGAAAATGGAGGCCAAAAATGATAGGGGGAATTGGAGGTTTTATCAAGGTCAGGCAATATGATCAGATACTTATAGAAATTTGTGGAAAAAAGGCTGTAGGTACAGTGCTAGTAGGACCTACACCTGTCAACATAATTGGGCGAAACATGTTGACTCAGATTGGTTGTACTTTAAATTTCCCAATTAGTCCTATTGACACTGTACCAGTAAAATTAAAGCCAGGAATGGATGGCCCAAGGGTTAAACAATGGCCATTGACAAAAGAGAAAATAGAAGCATTAACAGCAATTTGTGAG…
>619154_190923_URF_0107
TGGCAACGACCCCTTGTCACAATAAAGATAGGGGGACAATTAAAGGAAGCTCTATTAGATACAGGAGCAGATGATACAGTAATAGAAGACATAAATTTGCCAGGAAAATGGAAACCAAAAATGATAGGGGGAATTGGAGGTTTTATCAAAGTAAGACAATATGAACAGATACCCATAGAAATCTGTGGACATAAGGCTATAGGTACAGTATTAATAGGACCTACACCTGTCAACATAATTGGAAGAAATCTGTTGACTCAGCTTGGTTGTACTTTAAATTTTCCAATCAGTCCTATTGAAACTGTACCAGTAAAACTAAAGCCAGGAATGGATGGCCCAAAGGTTAAACAATGGCCATTGACAAAAGAGAAAATAGAAGCATTAACAGCAATTTGTGAG…
>100805_191010_URF_0107
TGGCAACGACCCCTTGTCACAATAAAGATAGGGGGGCAATTAAAGGAAGCTCTATTAGATACAGGAGCAGATGATACAGTATTAGAAGACATGAATTTGCCAGGRAAATGGAAACCAAAAATGATAGGGGGAATTGGAGGTTTTATCAARGTAAGACAGTATGAACAGATACCCATAGAAATCTGTGGACACAAAGCTGTAGGTACAGTATTAATAGGACCTACACCTGTCAACATAATTGGAAGAAATCTGTTGACTCAGCTTGGTTGTACTTTAAATTTTCCAATCAGTCCTATTGAAACTGTACCAGTAAAATTAAAGCCAGGAATGGATGGCCCAAAGGTTAAACAATGGCCATTGACAGAAGAAAAAATAAAAGCATTAACAGAAATTTGTAAA…
>304759_200623_URF_0107
TGGCAACGACCCCTTGTCACAGTAAAAATAGGGGGACAACTAAAAGAAGCTCTATTAGATACAGGAGCAGATGATACAGTATTAGAAGATATAAATTTGCCAGGAAAATGGAAACCAAAAATGATAGGGGGAATTGGAGGTTTTATCAAAGTAAGGCAATATGAGCAGATACTTATAGAGATTTGTGGAAAACAGGCTATAGGTACAGTGTTAGTAGGACCTACACCTGTCAACATAATTGGACGRAACATGTTGACTCAAATTGGTTGTACTTTAAATTTCCCCATTAGTCCTATTGARACTGTACCAGTAAAMTTAAAGCCAGGAATGGATGGCCCAAAGGTTAAACAATGGCCATTGACAAAAGAAAAAATAGAAGCATTAACAGCAATTTGTGAT…
>2020252_200623_URF_0107
TGGCAACGACCCCTTGTCACAGTAAAAATAGGGGGACAACTAAAAGAAGCTCTATTAGATACAGGAGCAGATGATACAGTATTAGAAGATATAAATTTGCCAGGAAAATGGAAACCAAAAATGATAGGGGGAATTGGAGGTTTTATCAAAGTAAAGCAATATGAACAGATACTTATAGAGATTTGTGGAAAACAGGCTATAGGTACAGTGTTAGTAGGACCTACACCTGTCAACATAATTGGACGAAATATGTTGACTCAAATTGGTTGTACTTTAAATTTCCCCATCAGTCCTATTGAGACTGTACCAGTAAACCTAAAGCCAGGAATGGATGGCCCAAAGGTTAAACAATGGCCATTGACAAAAGAAAAAATAGAAGCATTAACAGCAATTTGTGAT…
>324412_200714_URF_0107
TGGCAACGACCCCTTGTCACAATAAAAATAGGAGGACAGCTAAGGGAAGCTCTGCTAGATACAGGAGCAGATGATACAGTATTAGAAGATATAAATTTGCCAGGAAAATGGAAGCCAAAAATGATAGGGGGAATTGGAGGTTTTATCAAAGTAAGGCAATATGATCAGATACATATAGAAATTTGTGGAAAAAAGGCTATAGGTACAGTATTAGTAGGACCTACACCTGTCAACATAATTGGACGGAATATGTTGACTCAGCTTGGTTGTACTTTAAATTTTCCAATCAGTCCTATTGAAACTGTACCAGTAAAACTAAAGCCAGGAATGGATGGGCCAAAGGTTAAACAATGGCCATTGACAGAAGAAAAAATAAAAGCATTAACAGAAATTTGTACA…
>2020291_200714_URF_0107
TGGCAACGACCCGTTGTCTCAGTTAGAATAGAAGGACAGCTAAAAGAAGCTCTATTAGATACAGGRGCAGATGATACAGTATTAGAAGATATAAATTTGCCAGGAAAATGGAAACCAAAAATGATAGGGGGAATTGGAGGTTTTATCAAAGTAARGCAATATGATCAGRTACWTATAGAAATTTGTGGAAAAMAGGCTATAGGTACAGTGTTAGTAGGACCTACACCTGTCAACATAATTGGACGAAATATGTTGACTCAGATTGGTTGTACTTTAAATTTTCCAATTAGTCCTGTTGAAACTGTACCAGTRAAACTAAAGCCAGGAATGGATGGCCCAAAGGTTAAACAATGGCCATTGACAAAAGAAAAAATAGAAGCATTRACAGCAATWTGTGAK…
>2020310_200720_URF_0107
TGGCAACGACCCGTTGTCACAGTAAGAATAGAAGGACAGCTGAAAGAAGCTCTATTAGATACAGGAGCAGATGATACAGTATTAGAAGATATAAATTTGCCAGGAAAATGGAAACCAAAAATGATAGGGGGAATTGGAGGTTTTATCAAAGTAAGGCAATATGATCAGATACTTATAGAAATTTGTGGGAAAAAAGCTATAGGTACAGTGTTAGTAGGACCTACACCTGTCAACATAATTGGAGGAAATATGTTGACTCAGCTTGGTTGTACTTTAAATTTTCCAATCAGTCCTATTGAAACTGTRCCAGTAAAACTAAAGCCAGGAATGGATGGTCCAAAGGTTAAACAATGGCCATTGACAAAAGAGAAAATAGAAGCATTAACAGCAATTTGTGAT…
>2020326_200727_URF_0107
TGGCAACGACCCCTTGTCACAGTAAAAATAGGGGGACAACTAAAAGAAGCTCTATTAGATACAGGAGCAGATGATACAGTATTAGAAGATATAAATTTGCCAGGAAAATGGAAACCAAAAATGATAGGGGGAATTGGAGGTTTTATCAAAGTAAAGCAATATGAACAGATACTTATAGAGATTTGTGGAAAACAGGCTATAGGTACAGTGTTAGTAGGACCTACACCTGTCAACATAATTGGACGAAATATGTTGACTAAAATTGGTTGTACTTTAAATTTCCCCATCAGTCCTATTGAGACTGTACCAGTAAACCTAAAGCCAGGAATGGATGGCCCAAAGGTTAAACAATGGCCATTGACAAAAGAAAAAATAGAAGCATTAACAGCAATTTGTGAT…
>2020352_200811_URF_0107
TGGCAACGACCCCTTGTCACAGTAAAAATAGAAGGACAGCTAAGAGAAGCTCTATTAGATACAGGAGCAGATGATACAGTATTAGAAGATATAAATTTGCCAGGAAAATGGAAGCCAAAAATGATAGGGGGAATTGGAGGTTTTATCAAAGTAAGACAATATGATCAGATACCTATAGAAATTTGTGGAAAAAAGGCTATAGGTACAGTATTAGTAGGACCTACACCTGTCAACATAATTGGACGAAATATGTTGACTCAGCTTGGTTGTACTTTAAATTTCCCAATTAGTCCTATTGACACTGTACCAGTAACATTAAAGCCAGGAATGGATGGCCCAAAGGTCAAACAATGGCCATTAACAAAAGAGAAAATAGAAGCATTAACAGCAATCTGTGAA…
>304827_200901_URF_BC
TGGCAACGACCCCTTGTYACCATAAAGATAGGGGGGCAATTAAAGGAAGCTCTATTAGATACAGGAGCAGATGATACAGTATTAGAAGACATGAATTTGCCAGGAAAATGGAAACCAAAAATGATAGGGGGAATTGGAGGWTTTATCAAAGTAAGRCAGTATGAACAGATACCCATAGAAATCTGTGGACATAAAGCTATAGGTACAGTATTAGTAGGACCYACACCTGTCAACATAATTGGAAGAAATCTGTTGACTCAGATTGGTTGTACTTTAAATTTTCCAATYAGTCCTATTGAAACTGTACCAGTAAAAYTAAAGCCAGGAATGGATGGMCCAAAGGTTAARCAATGGCCATTGACAAAAGARAAAATAGAAGCATTAACAGCAATTTGTRAT…
>2020468_201021_URF_0107
TGGCAACGACCCATTGTCACAGTAAAAGTAGAAGGACAGATGATAGAAGCTCTATTAGATACAGGAGCAGATGATACAGTATTAGAAGATATAAATTTGCCAGGAAAATGGAAACCAAAAATGATAGGGGGAATTGGAGGTTTTATCAAGGTAAGACAATATGATCAAATACTTATAGAAATTTGTGGAAAAAAGGCTAGGRGTACAGTGTTAGTAGGACCTACACCTGTCAACATAATTGGAAGAAATATGTTGACTCAGATTGGTTGTACTTTAAATCTCCCAATTAGCCCTATTGACACTGTACCAGTAAAATTAAAGCCAGGAATGGATGGCCCAAAGGTTAAACAATGGCCATTGACAAAAGAGAARATAGAAGCATTAACAGCAATTTGTGAG…
>2020281_200519_URF_0107
TGGCAACGACCCATTGTTACAATAAAGATAGGGGGGCAATTAAAGGAAGCTCTATTAGATACAGGAGCAGATGATACAGTAGTAGAAGACATGAATTTGCCAGGGAAATGGAAACCAAAAATGATAGGGGGAATTGGAGGTTTTATCAAAGTAAGACAGTATGACCAGATACCCATAGAAATCTGTGGACATAAAGCTATAGGTACAGTATTAGTAGGACCTACACCTGTCAACATAATTGGAAGAAATCTGTTGACTCAGCTTGGTTGTACTTTAAATTTTCCAATAAGTCCTATTGAAACTGTACCAGTAAAACTAAAGCCAGGAATGGATGGCCCAAAGGTTAAACAATGGCCATTGACAAAAGAGAAAATAGAAGCATTAACAGCAATTTGTGAT…
>2020338_200803_URF_0107
TGGCAACGACCCCTTGTCACAATAAAGATAGGGGGGCAATTAAAGGAAGCTCTATTAGATACAGGAGCAGATGATACAGTATTAGAAGACATAAATTTGCCAGGAAAATGGAAACCAAAAATGATAGGGGGAATTGGAGGTTTTATCAAAGTAAGACAGTATGAACAGATACCTATAGAAATTTGTGGAAAAAAGGCTATAGGTACAGTRTTAGTAGGACCTACACCTGTCAACATAATTGGACGAAATATGTTGACTCAGCTWGGTTGTACTTTAAATTTCCCAATTAGCCCTATTGAAACTATMCCAGTAAMACTAAAGCCAGGGATGGATGGCCCAAAGGTTAAACAATGGCCATTGACAAAAGAAAAAATAGAAGCATTAACAGCAATTTGTRAT…
>324440_200818_URF_0107
TGGCAACGACCCCTTGTCACAATAAARATAGGGGGGCAATTAAAGGAAGCTCTATTAGATACAGGAGCAGATGATACAGTATTAGAAGACATAAATTTGCCAGGAAAATGGAAACCAAAAATGATAGGGGGAATTGGAGGTTTTATCAAAGTAAGACAGTATGAACAGATACCTATAGAAATTTGTGGAAAAAAGGCTATAGGTACAGTGTTAGTAGGACCTACACCTGTCAACATAATTGGACGAAATATGTTGACTCAGCTWGGTTGTACTTTAAATTTCCCAATTAGCCCTATTGAAACTATMCCAGTAAMACTAAAGCCAGGGATGGATGGCCCAAAGGTYAAACAATGGCCATTGACAAAAGAAAAAATAGAAGCATTAACAGCAATTTGTGAT…
>2020398_200907_URF_0107
TGGCAACGACCCATTGTTACAATAAAGATAGGGGGGCAATTAAAGGAAGCTCTATTAGATACAGGAGCAGATGATACAGTATTAGAAGACATGAATTTGCCAGGGAAATGGAAACCAAAAATGATAGGGGGAATTGGAGGTTTTATCAAAGTAAAACAGTATGAAGAGGTAACCATAGAAATCAGTGGACATAAAGTTATAGGTACAGTATTAGTAGGACCTACACCTGTCAACATAATTGGAAGAAATCTGTTGACTCAGCTTGGTTGTACTTTAAATTTTCCAATCAGTCCTATTGAAACTGTACCAGTAAAATTAAAGCCAGGAATGGATGGCCCAAAGGTTAAACAATGGCCATTGACAAAAGAGAAAATAGAAGCATTAACAGCAATTTGTGAT…
>323570_201104_URF_0107
TGGCAACGACCCCTWGTTACAATAAAAATAGAAGGACAGATAAAAGAAGCCCTGTTAGATACAGGAGCAGATGATACAGTATTAGAAGATATAGATTTGCCAGGAAAATGGAAACCAAAAATGATAGGGGGAATTGGAGGTTTTATCAAAGTAAGGCAATATGATCAGATACTTATAGAAATTTGTGGAAAGAAGGCTGTAGGTTCAGTGTTAGTAGGACCTACACCTGTCAACATAATTGGACGAAATATGTTGACTCAGCTTGGTTGTACTCTAAATTTCCCAATTAGCCCTATTGACACTGTACCAGTAAAATTAAAGCCAGGAATGGATGGACCAAGGGTTAAACAGTGGCCATTAACAGAAGAAAAAATAAAAGCATTAACAGAGATTTGTAAA…
>2020504_201020_URF_0107
TGGCAACGACCCGTTGTCGCAGTAAAAATAGAAGGACAGCTGAGAGAAGCTCTATTAGACACAGGAGCAGATGATACAGTATTAGAAGATATAAATTTGCCAGGAAAATGGAAACCAAAAATGATAGGGGGAATTGGAGGTTTTATCAAAGTAAGRCAATATGATCAGATACAGATAGAAATTTGTGGAAAAAGGGCTACAGGTACAGTRTTAGTAGGACCCACACCTGTCAACATAATTGGACGAAATATGTTGACTCAGATTGGTTGTACTTTAAATTTCCCAATTAGTCCTRTTGACACTGTACCAGTAAMATTAAAGMCAGGAATGGATGGACCAAAGGTTAAACAGTGGCCATTAACAGAAGAAAAAATAAAAGCATTAACAGAAATTTGTAAA…
>012317_180125_URF_0107
TGGCAACGACCCCTTGTCACAGTAAAAATAGGAGGACAGCTAAAAGAAGCTCTACTAGATACAGGAGCAGATGATACAGTATTAGAAGATATAGAGTTGCCAGGAAAATGGAAACCAAGAATGATAGGGGGAATTGGAGGTTTTATCAAAGTAAGACAGTATGAACAGATACCCTTAGAAATCTGTGGACATAAAGCTATAGGCACAGTATTAGTAGGACCTACACCTGTTAACATAATTGGAAGAAATCTGTTGACTCAGATTGGTTGTACTTTAAACTTTCCCATTAGTCCTATTGAAACTGTACCAGTACAATTAAAGCCAGGAATGGATGGCCCAAAGGTTAAACAATGGCCATTGACAAAAGAAAAAATAGAAGCATTAACAGCAATTTGTAAT…
>111908_191121_URF_0107
TGGCAACGACCCCTTGTCACAGTAAAAATAGGAGGACAGYTAAWAGAAGCTCTACTAGATACAGGAGCAGATGATACAGTATTAGAAGATRTAGATTTGCCAGGAAAATGGAARCCAAGAATGATAGGGGGAATTGGAGGTTTTATCAAAGTAAGACAGTATGAACAGATACCCTTAGAAATCTGTGGACATAAAGCTATAGGTACAGTATTAGTAGGACCTACACCTGTCAACATAATTGGAAGAAATCTGTTGACTCAGATTGGTTGTACTTTAAACTTTCCCATTAGTCCTATTGAAACTGTACCAGTRCAATTAAAGCCAGGAATGGATGGCCCAAAGGTTAAACAATGGCCATTGACAAAAGAAAAAATAGARGCATTAACAGCAATTTGTAAT…
>062107_160623_URF_0107
TGGCAACGACCCCTTGTCACAGTAAAAATAGGAGGACAGATGAAAGAAGCTCTGTTAGATACAGGAGCAGATGATACAGTATTAGAAGATATAGATTTACCAGGAAAATGGAAACCAAAAATGATAGGGGGAATTGGAGGTTTTATCAAGGTAAGACAATATGATCAGATACTTATAGAAATTTGTGGAAAAAAGGCTATAGGTACAGTGTTGGTAGGACCTACACCTGTCAACATAATTGGACGAAATATGTTGACTCAGATTGGTTGTACTTTAAACTTCCCAATTAGCCCTATTGACACKGTACCAGTAAAATTAAAGCCAGGAATGGATGGACCAAAGGTTAAACAATGGCCATTGACAAAAGAAAAAATAGAAGCATTAACAGCAATTTGTGAG…
>050820_180510_URF_0107
TGGCAACGACCCCTTGTCACAATAAAAATAGGAGGACAGATAAGAGAAGCTCTATTAGATACAGGAGCAGATGATACAGTATTAGAAGATATAAATTTGCCAGGAAAATGGAAGCCAAAAATGATAGGGGGAATTGGAGGTTTTATCAAGGTAAAGCAATATGATCAGGTACCCATAGAAATCTATGGACATAAAGCTGTAGGTACAGTATTAGTAGGACCTACACCTGTCAACATAATTGGAAGAAATCTGTTGACTCAGCTTGGTTGTACTTTAAATTTTCCAATCAGTCCTATTGAAACTGTACCAGTAAAACTAAAGCCAGGAATGGATGGCCCAAGGGTTAAACAATGGCCATTGACAAAAGAGAAAATAGAAGCATTAACAGCAATTTGTGAG…
>329350_200109_URF_0107
TGGCAACGACCCCTCGTCACAATAAAAGTAGAAGGACAGATAAAAGAAGCTCTATTAGATACAGGAGCAGATGATACAGTATTAGAAGATATAAATTTGCCAGGAAAATGGAAACCAAAAATGATAGGGGGAATTGGAGGTTTTATCAAGGTAAGGCAATATGATCAGATACTTATAGAAATTTGTGGAAAAAGGGCTATAGGTACAGTGTTAGTAGGACCTACACCTGTCAACATAATTGGACGAAATATGTTGACACAGCTTGGTTGTACTTTAAATTTCCCAATTAGCCCTATTGACACTGTACCAGTAAATCTAAAGCCAGGAATGGATGGCCCAAAGGTTAAACAATGGCCATTGACAAAAGAGAAGATAGAAGCATTAACAGCAATTTGTGAG…
>304699_200115_URF_0107
TGGCAACGACCTGTTGTCMCAGTAARARTAGAAGGRCAGATGAWAGAAGCTCTATTAGATACAGGAGCAGATGATACAGTATTAGAAGATATAAATTTGCCAGGAAAATGGAAACCAAAAATGATAGGGGGAATTGGAGGTTTTATCAAAGTAAGGCAATATGATCAGATACTTATAGAAATTTGTGGAAAAAAAACTATAGGTACAGTGTTAGTAGGACCTACACCTRTCAACATMATTGGACGAAATATGTTGACTRARATTGGTTGTACTTTAAATTTYCCAATYAGTCCYATTGAMACTGTACCAGTAAAAYTAAARCCAGGAATGGATGGWCCAAAGGTTAAACARTGGCCATTRACAGAAGARAAAATAAAAGCATTAACAGAAATTTGTAAG…
>304758_200623_URF_01B
TGGCAACGACCCCTTGTCTCAATAAAGATAGGGGGGCAAATAAAGGAAGCTCTATTAGATACAGGAGCAGATGATACAGTATTAGAAGAAATGAGTTTGCCAGGAARATGGAAACCAAAAATGATAGGGGGAATTGGAGGTTTTATCAAAGTAAGACAGTATGATCAAATAACCATAGAAATTTGCGGACATAAGGCTRTAGGTACAGTATTAATAGGACCTACACCTGTCAACATAATTGGAAGAAATCTGTTGACTCAGATYGGYTGCACTCTAAATTTTCCCATCAGTCCTATTGAAACTGTACCAGTAAAATTAAARCCAGGCATGGATGGMCCAAARGTTAARCARTGGCCATTGACAGAAGAAAAAATAAAAGCATTGRTAGAAATTTGTACA…
>303782_180327_URF_BD
TGGCAACGACCCCTCGTCACAATAAAGGTAGGGGGGCAGATAAAAGAAGCCCTATTAGACACAGGAGCAGATGATACAGTATTAGAAGAMATGAGTTTACCAGGGAAATGGAAACCAAAAATGATAGGGGGAATTGGAGGGTTTATTAAAGTAARACAGTATGAGCAGGTAGACATAGAAATTTGTGGRCATAAAGYTACAGGTACAGTRTTARTAGGACCYACACCTGTCAACATAATTGGAAGAAATCTGTTGACCCAGCTTGGSTGCACTTTAAATTTTCCCATTAGTCCTATTGAAACTGTACCAGTAAAATTAAAGCCAGGAATGGATGGCCCAAAAGTTAAACAATGGCCATTGACAGAAGAAAAAATAAAAGCATTAACAGAAATTTGTACA…
>303781_180327_URF_BD
TGGCAACGACCCCTAGTCACAATAAAGGTAGAGGGACAGCTAAAGGAAGCTCTATTAGACACAGGAGCAGATGATACAGTATTAGAAGAAATGAGTWTATCAGGGAAATGGAAACCAAAAATGATAGGGGGAATTGGAGGTTTTATTAAAGTAARACAGTATGAGCAGATAACCATAGAAATTTGTGGGCATAAAGTTACAGGTACARTATTAATAGGACCTACACCTGTCAACATARTTGGAAGAAATCTGTTGACCCAGCTTGGCTGCACTTTAAATTTTCCCATTAGTCCTATTGAAACTGTACCAGTAAAATTAAAGCCAGGAATGGATGGCCCAAAAGTTAAACAATGGCCATTGACAGAAGAAAAAATAAAGGCATTAACAGAAATTTGTACA…
>121106_181213_URF_0107
TGGCAACGACCCCTTGTYACMATAAAARTAGGGGGRCARWTRARGGAAGCTCTATTAGATACAGGAGCAGATGATACAGTATTAGAAGAYATRAATTTGCCAGGRAAATGGAAACCAAAAATGATAGGGGGAATTGGAGGTTTTATCAARGTAARRCARTATGATCAGATACYYATAGAAATTTGTGGAAAAAAGGCTATAGGTACAGTRTTAGTAGGACCTACACCTGTCAACATAATTGGAAGAAATCTGTTGACTCAGCTTGGWTGTACTTTAAATTTTCCAATCAGTCCTGTTGAAACTGTACCAGTAAAACTAAAGCCAGGAATGGATGGCCCAAAGGTTAAACAATGGCCATTGACAAAAGAAAAAATAGAAGCATTAACAGCAATTTGTGAT…
>304207_190117_URF_0107
TGGCAACGACCCCTTGTCACAGTAAAAATAGGAGGACAGTTAAAAGAAGCTCTATTAGATACAGGAGCAGATGATACAGTATTAGAAGATATAAATCTGCCAGGAAAATGGAAACCAAAAATGATAGGGGGAATTGGAGGTTTTATCAAGGTAAGACAATATGATCAGATACTTATAGAAATTTGTGGAAAAAGGGCTATAGGTACAGTATTGGTAGGACCTACACCTGTCAACATAATTGGACGAAATATGTTGACTCAGATTGGCTGTACTTTAAATTTCCCAATTAGTCCTATTAATACTGTACCAGTAACATTAAAGCCAGGAATGGATGGACCAAAGGTTAAACAATGGCCATTGACAAAAGAGAAAATAGAAGCATTAACAGCAATTTGTGAT…
>304239_190219_URF_0107
TGGCAACGACCCCTTGTCACAGTAAAAATAGGGGGACAACTAAAAGAAGCTCTATTAGATACAGGAGCAGATGATACAGTATTAGAAGATATAAATTTGCCAGGAAAATGGAAACCAAAAATGATAGGGGGAATTGGAGGTTTTATCAAAGTAAGGCAATATGAGCAGATACTTATAGAGATTTGTGGAAAACAGGCTATAGGTACAGTGTTAGTAGGACCTACACCTGTCAACATAATTGGACGAAACATGTTGACTCAAATTGGTTGTACTTTAAATTTCCCCATTAGTCCTATTGAAACTGTACCAGTACAACTAAAGCCAGGAATGGATGGCCCAAAGGTTAAACAATGGCCATTGACAAAAGAAAAAATAGAAGCATTAACAGCAATTTGTGAT…
>022603_190228_URF_0107
TGGCAACGACCCCTTGTCACAATAAAAATAGAAGGACAGCTAAAAGAAGCTCTATTAGATACAGGAGCAGATGATACAGTATTAGAAGATATAAATCTGCCAGGAAAATGAAAACCAAGAATGATAGGGGGAATTGGAGGTTTTATCAAGGTAAGGCAATATGATCAGATACTTATAGAAATTTGTGGAAAAAAGGCTATAGGTACAGTGTTAGTAGGACCTACACCTGTCAACATAATTGGAAGAAATATGTTGACTCAGCTTGGTTGTACTTTAAATTTCCCAATTAGTCCTATTGACACTGTACCAGTAACATTAAAGCCAGGAATGGATGGACCAAAGGTTAAACAATGGCCATTGACAAAAGAAAAAATAGAAGCATTAACAGCAATTTGTGAG…
>619048_190304_URF_0107
TGGCAACGACCCCTTGTCACAGTAAGAATAGAAGGACAGCTGAGAGAAGCTCTATTAGATACAGGAGCAGATGATACAGTATTAGAAGATATAAATTTGCCAGGAAAATGGAAACCAAAAATGATAGGGGGAATTGGAGGTTTTATCAAAGTAAAGCAATATGACCAGATACTTATAGAAATTTGTGGAAAAAAGGCTATAGGTACAGTGTTGGTAGGACCTACACCTGTCAACATAATTGGACGAAATATGTTGACTCAGCTTGGTTGTACTTTAAATTTTCCAATCAGTCCTATTGAAACTATACCAGTAAAACTAAAGCCAGGAATGGATGGCCCAAAGGTTAAACAATGGCCATTGACAAAAGAAAAAATAGAAGCATTAACAGCAATATGTGAT…
>030504_190307_URF_0107
TGGCAACGACCCCTTGTCACAGTAAAAATAGGGGGACAACTAAAAGAAGCTCTATTAGATACAGGAGCAGATGATACAGTATTAGAAGATATAAATTTGCCAGGAAAATGGAAACCAAAAATGATAGGGGGAATTGGAGGTTTTATCAAAGTAAGGCAATATGAGCAGATACTTATAGAGATTTGTGGAAAACAGGCTATAGGTACAGTGTTAGTAGGACCTACACCTGTCAACATAATTGGACGAAACATGTTGACTCAAATTGGTTGTACTTTAAATTTCCCCATTAGTCCTATTGAAACTGTACCAGTACAACTAAAGCCAGGAATGGATGGCCCAAAGGTTAAACAATGGCCATTGACAAAAGAAAAAATAGAAGCATTAACAGCAATTTGTGAT…
>304291_190319_URF_0107
TGGCAACGACCCCTTGTTACCATAAAGATAGGGGGGGAATTAAAGGAAGCTCTGTTAGATACAGGGGCAGATGATACAGTGTTAGAAGACATGAATTTGCCAGGGAAATGGAAACCAAAAATGATAGGGGGAATTGGAGGTTTTATCAAAGTAAGGCAATATGATCAAATACCCATAGAAATTTGTGGAAAAAAGGCTATAGGTACAGTGTTAGTAGGACCTACACCTGTCAACATAATTGGACGAAATATGTTGACTCAGATTGGTTGTACTTTAAATCTCCCCATTAGTCCTATTGACACTGTACCAGTAAAACTAAAGCCAGGAATGGATGGCCCAAAGGTTAAACAATGGCCATTGACAAAAGAGAAAATAGAAGCATTAACAGCAATTTGTGAT…
>619107_190715_URF_0107
TGGCAACGACCCCTTGTCACAGTAAAAATAGGGGGASARCTAAAAGAAGCTCTATTAGATACAGGRGCAGATGATACAGTATTAGAAGATATAAATTTGCCAGGAAAATGGAAACCAAAAATGATAGGGGGAATTGGAGGTTTTATCAAGGTAAGGCARTATGATCAGATACTTATAGAAATTTRTGGAAAAAAGGCTATAGGTACAGTRTTAGTAGGACCTACACCTGTCAACATAATTGGACGAAACATGTTGACTCAAATTGGKTGTACTTTRAATTTCCCCATTAGTCCTATTGAAACTGTACCAGTACAACTAAAGCCAGGAATGGATGGCCCAAAGGTTAAACAATGRCCATTGACAAAAGAAAAAATAGAAGCATTAACAGCAATTTGTGAT…
>619126_190812_URF_0107
TGGCAACGACCCCTTGTCACAATAAAAATAGSAGGACAGWTAAAAGAAGCTCTATTAGATACAGGAGCAGATGATACAGTATTAGAAGATATAAATTTGCCAGGAAAATGGAAGCCAAAAATGATAGGGGGAATTGGAGGTTTTATCAAAGTAAGGCAATATGAKSARATACTTATAGAAATTTGTGGRAAAAAGGCTATAGGTACAGTGTTAGTAGGGCCTACACCTATCAACATAATTGGACGAAAYATGTTGACTCAGCTTGGRTGTACTTTAAATTTCCCAATTAGCCCTATTGACACTATACCAGTAAAATTAAAGCCAGGAATGGATGGMCCAAAGGTTAAACAGTGGCCATTRACAAAAGAGAAAATAGAAGCATTAACAGCAATTTGTGAT…
>323776_190907_URF_0107
TGGCAACGACCCCTTGTCACAGTAAAAATAGGAGGACAGTTAAAAGAAGCTCTATTAGATACAGGAGCAGATGATACAGTATTAGAAGATATAAATCTGCCAGGAAAATGGAAACCAAAAATGATAGGGGGAATTGGAGGTTTTATCAAGGTAAGACAATATGATCAGATACCTATAGAAATCTGTGGAAAAAGGGCTATAGGTACAGTATTGGTAGGACCTACACCTGTCAACATAATTGGACGAAATATGTTGACTCAGATTGGCTGTACTTTAAATTTCCCAATTAGTCCTATTAATACTGTACCAGTAACATTAAAGCCAGGAATGGATGGACCAAAGGTTAAACAATGGCCATTGACAAAAGAGAAAATAGAAGCATTAACAGCAATTTGTGAT…
>304577_190925_URF_0107
TGGCAACGACCCCTTGTCACAATAAAAATAGGAGGACAGTTAAGAGAAGCTCTATTAGATACAGGAGCAGATGATACAGTATTAGAAGATATAAATTTGCCAGGAAAATGGAAACCAAAAATGATAGGGGGAATTGGAGGTTTTATCAAGGTAAGGCAATATGATCAGATACTTATAGAAATTTGTGGAAAAAAGGCTATAGGTACAGTATTAGTAGGACCTACACCTGTCAACATAATTGGACGAAATATGTTGACTCAGATTGGTTGTACTTTAAATTTCCCAATTAGTCCTATTGACACTGTACCAGTAAGATTAAAGCCAGGAATGGATGGCCCAAAGGTTAAACAATGGCCATTGACAAAAGAGAAAATAGAAGCATTAACAGCAATTTGTGAT…
>304578_190920_URF_0107
TGGCAACGACCCCTTGTCACAATAAAAATAGGAGGACAGTTAAGAGAAGCTCTATTGGATACAGGAGCAGATGATACAGTATTAGAAGATATAAATTTGCCAGGAAAATGGAAACCAAAAATGATAGGGGGAATTGGAGGTTTTATCAAGGTAAGGCAATATGATCAGATACTTATAGAAATTTGTGGAAAAAAGGCTATAGGTACAGTGTTAGTAGGACCTACACCTGTCAACATAATTGGACGAAATATGTTGACTCAGATTGGTTGTACTTTAAATTTCCCAATTAGTCCTATTAACACTGTACCAGTAAGATTAAAGCCAGGAATGGATGGCCCAAAGGTTAAACAATGGCCATTGACAAAAGAGAAAATAGAAGCATTAACAGCAATTTGTGAT…
>011707_170119_URF_0107
TGGCAACGACCCCTCGTCGCAATAAAGATAGGGGGGCAATTAAAGGAAGCTCTATTAGATACAGGAGCAGATGATACAGTGTTAGAAGACATGAATTTGCCAGGAAAATGGAAACCAAAAATGATAGGGGGAATTGGAGGTTTTATCAAAGTAAGACAGTATGAACAGATACCAATAGAAATCTGTGGACACAAAGCTATAGGTACAGTATTAATAGGACCAACACCTGTCAACATAATTGGAAGAAATCTGTTGACTCAGCTTGGTTGCACTTTAAATTTTCCAATCAGTCCTATTGAAACTGTACCAGTAAAATTAAAGCCAGGAATGGATGGCCCAAAGGTTAAACAATGGCCATTGACAGAAGAGAAAATAAAAGCATTAACAGAAATTTGTGAT…
>010902_180111_URF_0107
TGGCAACGACCCCTTGTCACAATAAAAATAGGAGGACAGCTAAGAGAAGCTCTATTAGATACAGGAGCAGATGATACAGTATTAGAAGACATGAATTTGCCAGGGAAATGGAAACCAAAAATGATAGGGGGAATTGGAGGTTTTATCAAGGTAAGGCAATATGATCAGATACCAATAGAAATTTGTGGAAAAAGGGCTATAGGTACGGTGTTAATAGGACCTACACCTATCAACATAATTGGACGGAATATGTTGACTCAGCTTGGTTGTACTTTAAATTTTCCAATCAGTCCTATTGAAACTGTACCAGTAAAATTAAAGCCAGGWATGGATGGCCCAAAGGTTAAACAATGGCCATTGTCAAAAGAGAAAATAGAGGCATTAACAGCAATTTGTGAG…
>022733_180301_URF_BC
TGGCAACGACCCCTTGTCACAATAAAGATAGGGGGRCAATTAAAGGAAGCTCTATTAGATACAGGAGCAGATGATACAGTATTAGAAGACATGAATTTGCCAGGGAAATGGAAACCAAAAATGATAGGGGGAATTGGAGGTTTTATCAAAGTAAAACAGTATGAAGARATACCCATAGAAATTTGTGGGCACAAARCTGTAGGTACAGTGTTAATAGGACCTACACCTGTCAACATAATTGGAAGAAATCTGTTGACTCAGCTTGGTTGTACTYTAAATTTTCCCATCAGTCCTATTGAAACTGTACCAGTAAAATTAAAGCCAGGGATGGATGGCCCAAARGTTAAACAATGGCCATTGACAGAAGARAAAATAGAAGCATTAAMAGCAATTTGTGAT…
>041011_180412_URF_0107
TGGCAACGACCCGTTGTCACAGTAAGAATAGAAGGACAGCTGAAAGAAGCTCTATTAGATACAGGAGCAGATGATACAGTATTAGAAGAGATAGAATTACCAGGAAAATGGAAACCAAAAATGATAGGGGGAATTGGAGGTTTTATCAAAGTAAGGCAATATGATCAGATACTCATAGAAATTTGTGGAAAAAGGGCTATAGGTACAGTGTTAGTAGGACCTACACCTGTCAACATAATTGGACGAAATATGTTGACTCAGCTTGGTTGTACTTTAAATTTTCCAATTAGTCCTGTTGACACTGTACCAGTAACATTAAAGCCAGGAATGGATGGCCCAAAGGTTAAACAATGGCCATTGACAAAAGAAAAAATAGAAGCATTAACAGCAATTTGTGAT…
>042406_180426_URF_0107
TGGCAACGACCCCTTGTCACAATAAAARTAGGAGGACAGCTAAGAGAAGCTCTATTAGATACAGGAGCAGATGATACAGTATTAGAAGATATAAATTTGCCAGGAAAATGGAAACCAAAAATGATAGGGGGAATTGGAGGTTTTATCAAGGTAAGGCAATATGATCAGATACTTATAGAAATTTGTGGAAAAAAGGCYATAGGTACAGTRTTAGTAGGACCTACACCTGTCAACATAATTGGACGAAATATGTTGACTCAGCTTGGTTGTACTTTAAATTTCCCAATTAGTCCTATTGACACTGTACCAGTAACATTAAAGCCAGGAATGGATGGACCAAAGGTTAAACAATGGCCATTGACAAAAGAGAAAATAGAAGCATTAACAGCAATTTGTGAT…
>040902_190411_URF_01A1
TGGCAACGACCCCTTGTCACAGTAAAAATAGGAGGGCAGCTAAAAGAAGCTCTATTAGATACAGGAGCAGATGATACAGTATTAGAAGADATAAATTTGCCAGGAAAATGGARACCAAAAATGATAGGGGGAATTGGAGGTTTTATTAAGGTAAGACAGTATGATCACATACTTATAGAAATTTGTGGAAAAAAGGCTATAGGTACAGTATTAGTAGGACCYACACCTGTCAACATAATTGGAAGAAATATATTGGCTCAGATTGGTTGTACTTTAAATCTTCCAATTAGTCCTATTGAGACTGTACCAGTAAAATTAAAGCCAGGAATGGATGGYCCAAGGGTTAAACAATGGCCATTGACAGAAGAAAAAATAAAAGCATTAACAGAAATTTGTMAR…
>304313_190402_URF_0107
TGGCAACGACCCCTCGTCACAATAAAAGTAGAAGGACAGATAAAAGAAGCTCTATTGGATACAGGAGCAGATGATACAGTATTAGAAGATATAAATTTGCCAGGAAAATGGAAACCAAAAATGATAGGGGGAATTGGAGGTTTTATCAAGGTAAGGCAATATGATCAGATACTTATAGAAATTTGTGGAAAAAGGGCTATAGGTACAGTGTTAGTAGGACCTACACCTGTCAACATAATTGGACGAAATATGTTGACACAGCTTGGTTGTACTTTAAATTTCCCAATTAGCCCTATTGACACTGTACCAGTAAATCTAAAGCCAGGAATGGATGGCCCAAAGGTTAAACAATGGCCATTGACAAAAGAGAAGATAGAAGCATTAACAGCAATTTGTGAG…
>041221_160414_URF_01B
TGGCAGCGACCCCTCGTCCCAATAAAGATAGGGGGRCAACAAAAGGAAGCTCTATTAGATACAGGAGCAGATGATACAGTATTAGAAGAAATGAGTATACCAGGGARRTGGAAACCAAAAATGATAGGGGGAATTGGAGGTTTTATCAARGTAAGACAGTATGATCAGATACCTATAGAAATTTGTGGACATAARGYTATAGGTACAGTATTARTAGGACCTACACCTGTCAACATAATTGGAAGAAATYTGTTGACTCAGCTTGGCTGCACTTTAAATTTTCCCATTAGTCCTATTGAMACTGTACCAGTAAAATTAAAGCCAGGTATGGATGGCCCAAAAGTTAAACAATGGCCATTRACAGAAGAAAAAATAAAAGCATTARYAGAAATTTGTACA…
>060715_160608_URF_0107
TGGCAACGACCCATTGTCACAGTAAAAATAGAAGGACAGCTGAAAGAAGCTCTATTAGATACAGGGGCAGATGATACAGTATTAGAGGATATAAATTTGCCAGGAAAATGGAAGCCAAAAATGATAGGGGGAATTGGAGGTTTTATCAAAGTAAGGCAATATGATCAGGTAGTTATAGAAATTTGTGGAAAAARGGCTATAGGTACAGTGTTAGTAGGACCTACACCTGTCAACATAATTGGACGAAATATGTTGACTCAGATTGGTTGTACTTTAAATYTMCCAATTAGCCCTATTGACACTGTACCAGTAACATTAAARCCAGGAATGGATGGACCAAAGGTTAAACAATGGCCATTAACAGAAGAAAAAATAAAAGCATTAACAGAAATTTGTAAA…
>062120_160623_URF_01B
TGGCAACGACCCCTCGTCACAATAAAGATAGGGGGGCAACTAAAGGAAGCTCTATTAGATACAGGAGCAGATGATACAGTATTAGAAGATATGACTTTGCCAGGAAAATGGAAACCAAAAATGATAGGGGGAATTGGCGGTTTTATCAAAGTAAGACAGTATGATCAGGTACCCATAGAAATCTGTGGACATAAAGCTATAGGTACAGTATTAGTAGGACCTACACCTGTCAACATAATAGGAAGAAATCTGTTGACTCAGCTTGGGTGCACTTTAAATTTTCCCATTAGTCCTATTGAAACTGTACCAGTAAAATTAAAGCCAGGAATGGATGGCCCAAAAGTTAAACAATGGCCATTGACAGAAGAAAAAATAAAAGCATTAGTAGAAATTTGTACA…
>082312_160825_URF_01B
TGGCAGCGACCCMTCGTCACAATAAAGATAGGGGGGCAAATAAAGGAAGCYCTATTAGATACAGGAGCAGATGATACAGTGTTAGAAGAAATGAGCTTACCAGGAAGATGGAAACCAAAAATGATAGGGGGAATTGGAGGTTTTATCAAAGTAAGACAGTATGATCAGATATGCATGGAAATCKGTGGACATAAAGCTATAGGTACAGTATTAATAGGACCTACACCTGTCAACATAATTGGAAGAAATCTGTTGACTCAGATTGGCTGCACTTTAAATTTTCCCATTAGTCCTATTGAAACTGTACCAGTAAAATTAAAGCCAGGAATGGATGGCCCAAAAGTTAAACAATGGCCATTGACAGAAGAGAAAATAAAAGCATTAGTAGAAATTTGTACA…
>102522_161027_URF_0107
TGGCAACGACCCCTTGTCCCAATAAAAATAGGAGGACAGATGAGAGAAGCTCTGTTAGATACAGGAGCAGATGATACAGTATTAGAAGATATAAATTTGCCAGGAAAATGGAAACCAAAAATGATAGGGGGAATTGGAGGTTTTATCAAAGTAAGRCAATATGAWCAGATACCYATAGAAATYTGTGGACATGARGTTAYAGGTACAGTRTTAGTAGGACCTACACCTGTCAACATAATTGGRAGAAATHTGTTGACTCAGCTTGGTTGTACTTTAAATTTTCCAATYAGTCCTATTGAMACTGTACCAGTAAAAYTAAAGCCAGGAATGGATGGMCCAAAGGTTAAACARTGGCCATTRACARAAGARAAAATARAAGCATTAACAGMAATTTGTRAG…
>121317_161215_URF_01B
TGGCAGCGACCCTTAGTCACAATAAAAATAGGAGGACAGCTGAGAGAAGCTCTATTAGATACAGGAGCAGATGATACAGTATTAGAAGAAATAGATTTGCCAGGAAAATGGAAACCAAAAATGATAGGGGGAATTGGAGGTTTTATCAAAGTAAGGCAATATGATCAGATACCTATAGAAATTTGTGGAAAAAGGGCTATAGGTACAGTGTTAGTAGGACCTACACCTGTCAACATAATTGGAAGAAATATRTTGACTCAGCTTGGTTGTACTTTAAATYTTCCAATTAGTCCTATTRMCACTGTACCAGTAACATTAAAAYCAGGAATGGATGGACCAAAGGTTAAACAGTGGCCATTGACAGAAGAAAAAATAAAAGCATTAACAGAAATTTGTAGG…
>302515_160119_URF_01B
TGGCARCGACCCATCGTCACAATAAAGATAGGGGGGCAAATAAAGGAAGCTCTATTAGATACAGGAGCAGATGATACAGTGTTAGAAGAAATGAGCTTACCAGGAAGATGGAAACCAAAAATGATAGGGGGAATTGGAGGTTTTATCAAAGTAAGACAGTATGATCAGATATGCATRGAAATYTGTGGACATAAAGCTATAGGTACAGTATTAATAGGACCTACACCTGTCAACATAATTGGAAGAAATCTGTTGACTCAGATTGGCTGCACTTTAAATTTTCCCATTAGTCCTATTGAAACTGTACCAGTAACATTAAAGCCAGGAATGGATGGCCCAAAAGTTAAACAATGGCCATTGACAGAAGARAAAATAAAAGCATTAGTAGAAATTTGTACA…
>022112_170223_URF_01B
TGGCAACGACCCTTAGTCACAATAAAGGTAGGGGGGCAAMTAAAGGAAGCTCTATTAGACACAGGAGCAGATGATACAGTRYTAGAAGAAATGAATTTACCAGGRAAATGGAAACCAAAAATGATAGGGGGAATTGGAGGTTTTATCAAAGTAAGRCARTATGATCAGATARCTATAGAAATYTGYGGACATAAGGCTATAGGTACAGTRTTAGTAGGACCTACACCTGTCAACATAATTGGAAGAAATMTGTTGACTCAGCTTGGYTGYACTTTAAATTTTCCMATTAGTCATATTGACACTGTACCAGTAAMATTAAAGCCAGGAATGGATGGSCCAAARGTKAAACAGTGGCCATTGACAGARGAAAAAATAAAAGCATTAAYAGAAATTTGYACA…
>062017_170622_URF_0107
TGGCAACGACCCCTTGTCACARTAAAGATAGGGGGGCAATTAAARGAAGCTCTATTRGATACAGGAGCAGATGATACAGTATTAGAAGAWATGAATTTGCCAGGGAAATGGAAACCAAAAATGATAGGGGGAATTGGAGGTTTTATYAAAGTAAGACAGTATGAACAAATACCCATAGAAATCTGTGGACAWAAAGCCATAGGTACAGTRTTAATAGGACCTACACCTGTCAACATAATTGGAAGAAATCTGTTGACTCAGCTTGGTTGTACTTTAAATTTTCCAATYAGTCCTATTGAAACTGTACCAGTAAAAYTAAAGCCAGGAATGGATGGCCCAAAGGTYAAACAATGGCCATTGACAAAAGARAAAATAGAAGCATTAACAGCAATTTGTRAW…
>130046_171020_URF_01B
TGGCAACGACCCTTAGTTACAATAAGGGTAGGGGGACAGYTAAAAGAAGCYYTATTAGATACAGGAGCAGATGATACAGTATTAGAAGATATAGATTTACCAGGAAAATGGAAACCAAAAATGATAGGGGGRATTGGAGGTTTTATTAARGTAAGGCAATATGATCAGRTACMTRTAGAAATTTGTGGRAAAARGACTATAGGTACAGTRYTAGTAGGACCCACGCCTGTCAACATAATTGGAAGAAATCTGTTGACTCAGCTTGGCTGYACTTTAAATTTTCCCATTAGTCCTATTGACACTGTACCAGTAAAATTAAAGCCAGGAATGGATGGTCCAAAAGTGAAACAGTGGCCATTGACARAAGAAAAAATAAAAGCATTAACAGAAATTTGTAAG…
>032722_180329_URF_01B
TGGCAACGACCCCTTGTCACAATAAAAATAGGAGGACAGCTAAGAGAAGCTCTATTAGATACAGGAGCAGATGATACAGTATTAGAAGATATAAATTTACCAGGAAAATGGAAACCTAAAATGATAGGGGGAATTGGAGGTTTTATCAAAGTAAGGCAATATGATCAGATACCTATAGAAATTTGTGGAAAAAGGGCTATAGGTACAGTGTTAGTAGGACCTACACCTGTCAACATAATTGGACGAAATATGTTGACTCAGCTTGGTTGCACTTTAAATTTTCCCATTAGTCCTATTGAAACTGTACCAGTAAAATTAAAGCCAGGAATGGATGGACCAAAGGTTAAACAATGGCCATTGACAGAGGAAAAAATAAAAGCATTAGTAGAAATTTGTACA…
>060503_180607_URF_01B
TGGCAACGACCCCTTGTCACAATAAAAATAGGAGGACAGCTAAGAGAAGCTCTATTAGATACAGGAGCAGATGATACAGTATTAGAAGATATAAATTTACCAGGAAAATGGAAACCTAAAATGATAGGGGGAATTGGAGGTTTTATCAAAGTAAGRCAATATGATCAGATACCTATAGAAATTTGTGGAAAAAGGGCTATAGGTACAGTGTTAGTAGGACCTACACCTGTCAACATAATTGGACGAAATATGTTGACTCAGCTTGGTTGCACTTTAAATTTTCCCATTAGTCCTATTGAAACTGTACCAGTAAAATTAAAGCCAGGAATGGATGGACCAAAGGTTAAACAATGGCCATTGACAGAGGAAAAAATAAAAGCATTAGTAGAAATTTGTACA…
>304134_181122_URF_01B
TGGCAACGACCCCTTGTYACAATAAAAGTAGAAGGACAGCTACTAGAAGCTCTATTAGATACAGGAGCAGATGATACAGTATTAGAAGATATAAATTTGCCAGGAAAATGGAAACCAAAAATGATAGGGGGAATTGGAGGYTTTATCAAGGTAAGRCAATATGATCAGATAGTTATAGAAATTTGTGGAAAGAGGGCTATAGGTACAGTGTTAGTAGGACCTACACCTGTCAACATAATTGGACGAAATGTGTTGACTCAGCTTGGTTGTACTTTAAATTTTCCCATTAGTCCTATTGACACKGTACCAGTAAAATTAAAGCCAGGAATGGATGGACCAAAGGTTAAACAGTGGCCATTGACARAAGAAAAAATAAAAGCATTAACAGAAATTTGYRAA…
>304375_190514_URF_01B
TGGCAGCGACCCGTAGTCRCAATAAAAGTRGGAGGACAGCTAAGAGAAGCTCTATTAGATACAGGAGCAGATGATACAGTATTAGAARATATAGATTTRCCAGGAAAATGGAAACCAAAAATGATAGGGGGAATTGGAGGTTTTATCAAAGTAAGGCAATATGATCAGATAYCTATAGAAATTTGTGGAAAAAGGGCTATAGGTACAGTGTTAGTAGGACCTACACCTGTCAACATAATTGGACGAAATATGTTGACTCAGCTGGGTTGTACTTTAAATTTTCCAATTAGTCCTATTGACACTGTACCAGTAACATTAAAACCAGGAATGGATGGACCAAAGGTTAAACAATGGCCATTGACAGAAGAAAAAATAAAAGCATTAACAGAAATTTGTARG…
>304420_190604_URF_01B
TGGCAACGACCCCTTGTCACAGTAAAAATAGGAGGACAGTTGAAAGAAGCTCTATTAGATACAGGAGCAGATGATACAGTATTGGAARATATAAATTTGCCAGGAAAATGGAAACCAAAAATGATAGGGGGAATTGGAGGTTTTATCAAAGTAAGGCAATATGATCAGATACTCATAGAAATTTGTGGGAAAAAGGCTATAGGTACAGTGTTAGTAGGACCTACACCTGTTAACATAATTGGACGAAATATGTTGACTCAGATTGGTTGTACTTTAAACTTCCCAATTAGTCCTGTTGACACTGTACCAGTAACATTAAAGCCAGGAATGGATGGCCCAAGAGTTAAACAATGGCCACTGACAGAAGAAAAAATAAAAGCTTTAGTAGAAATTTGTACA…
>323240_190716_URF_01B
TGGCAACGACCCCTTGTCACAGTAAAAATAGGAGGACAGATAAAAGAAGCTCTATTAGATACAGGAGCAGATGATACAGTATTAGAAGATATAAATTTGCCAGGAAAATGGAARCCAAAAATGATAGGGGGAATTGGAGGTTTTATCAAGGTAAGGCAATATGATCAGATAGTTATAGAAATTTGTGGAAAAAGGGCTATAGGTACAGTGTTAATAGGACCTACACCTATCAACATAATTGGACGAAATATGTTGACTCAGCTTGGTTGTACTTTAAATTTTCCTATTAGTCCTATTGAAACTGTACCAGTAAAATTAAAGCCAGGGATGGATGGCCCAAAGGTTAAACAATGGCCATTGACAGAAGAAAAAATAAAAGCATTAGTAGAAATTTGTACA…
>323885_190801_URF_01B
TGGCAACGACCCCTTGTCTCAATAAAAATAGGGGGGCAAATAAAGGAAGCTCTATTGGATACAGGAGCAGATGATACAGTATTAGAAGAAATGAGTTTGCCAGGAAGATGGAAACCAAAAATGATAGGGGGAATTGGAGGTTTTATCAAAGTAAGACAGTATGATCAAATAGCCATAGAAATTTGCGGACATAAAGCTATAGGTACAGTATTAATAGGACCTACACCTGTCAACATAATTGGAAGAAATCTGTTGACTCAGATTGGCTGCACTCTAAACTTTCCCATTAGTCCTATTGAAACTGTACCAGTAAAATTAAAGCCAGGCATGGATGGCCCAAAAGTTAAGCAATGGCCATTGACAGAAGAAAAAATAAAAGCATTGGTAGAAATTTGTACA…
>304553_190906_URF_0107
TGGCAACGACCCRTKGTCACAGTAAAAATAGAAGGACAGCTGAAAGAAGCTCTATTAGATACAGGGGCAGATGATACAGTATTAGARGATATAAATTTGCCAGGAAAATGGAAGCCAAAAATGATAGGGGGAATTGGAGGTTTTATCAAAGTAAGRCAATATGATCAGGTAGTTATAGAAATTTGTGGAAAAAGGGCTATAGGTACAGTGTTAGTAGGACCYACACCTGTCAACATAATTGGACGAAATATGTTGACTCAGATTGGTTGTACTTTAAATTTYCCAATTAGYCCTATTGACACTGTACCAGTAAMATTAAAGCCAGGAATGGATGGACCAAAGGTTAAACAATGGCCATTRACAGAAGAAAAAATAAAAGCATTAACAGAAATTTGYAAR…
>040503_160407_URF_0107
TGGCAACGACCCCTTGTCACAGTAAAAATAGGAGGACAGCTAAAAGAAGCTCTACTAGATACAGGAGCAGATGATACAGTATTAGAAGATATAGATTTACCAGGAAAATGGAAACCAAGAATGATAGGGGGAATTGGAGGTTTTATCAAAGTAAGACAGTATGAACAGATACCCTTAGAAATCTGTGGACATAAAGCTATAGGTACAGTATTAGTAGGACCTACACCTGTCAACATAATTGGAAGAAATCTGTTGACTCAGATTGGTTGTACTTTAAACTTTCCCATTAGTCCTATTGAAACTGTACCAGTACAATTAAAGCCAGGAATGGATGGCCCAAAGGTTAAACAATGGCCATTGACAAAAGAAAAAATAGAAGCATTAACAGCAATTTGTGAT…
>051711_160519_URF_0107
TGGCAACGACCCCTTGTCACAATAAAAATAGGAGGGCAGCTAAAAGAAGCTCTATTAGATACAGGAGCAGATGATACAGTATTAGAAGATATAAATTTGCCAGGAAAATGGAAACCAAAAATGATAGGGGGAATTGGAGGTTTTATCAAGGTAAGGCAATATGATCAGATACTTATAGAAATTTGTGGAAAAARGGCTATAGGTACAGTATTAGTAGGACCTACACCTGTCAACATAATTGGACGAAATATGTTGACTCAGATTGGTTGTACTTTAAATTTYCCAATTAGTCCTATTGACACTGTACCAGTRACATTAAAGCCAGGAATGGATGGACCAAAGGTTAAACAATGGCCATTGACAAAAGAGAAAATAGAAGCATTAACAGCAATTTGTGAT…
>062808_160630_URF_0107
TGGCAACGACCCATTGTCACAGTGAGAATAGAAGGRCAGCTGAAAGAAGCTCTATTAGATACAGGGGCAGATGATACAGTATTAGAAGATATAAATTTGCCAGGGAAATGGAAACCAAAAATGATAGGGGGAATTGGAGGTTTTATCAAAGTAAGACAGTATGAYCAGATAACCATAGAAATYTGTGGACATAAAGCTATAGGTACAGTRTTAGTAGGACCTACACCTGTCAACATAATTGGAAGAAATCTGTTGACTCAGMTTGGTTGTACTTTAAATTTTCCAATCAGTCCTATTGAAACTGTACCAGTAAAACTAAAGCCAGGAATGGATGGCCCAAAGGTTAAACAATGGCCATTGACAAAAGAGAAAATAGAAGCATTAACAGCAATTTGTGAT…
>062820_160630_URF_0107
TGGSAACGACCCCTTGTCACAATAAAAATAGGAGGACAGCTAAAAGAAGCTCTATTAGATACAGGAGCAGATGATACAGTATTAGAAGATATAAATTTGCCAGGAAAATGGAAACCAAAAATGATAGGGGGAATTGGAGGTTTTATCAAGGTAAGGCAATATGATCAGATACTTATAGAAATTTGTGGAAAAAAGGCTATAGGTACAGTATTAGTAGGACCTACACCTGTCAACATAATTGGACGAAATATGTTGACTCAGATTGGTTGTACTTTAAATTTCCCAATTAGTCCTATTGACACTGTRCCAGTAACATTAAAGCCAGGAATGGATGGACCAAAGGTTAAACAATGGCCATTGACAAAAGARAAAATAGAAGCATTAACAGYAATTTGTGAT…
>070511_160707_URF_0107
TGGCAACGACCCCTTGTCACAGTAAAAATAGGAGGACAGCTAAAAGAAGCTCTACTAGATACAGGAGCAGATGATACAGTATTAGAAGATATAGATTTGCCAGGAAAATGGAAACCAAGAATGATAGGGGGAATTGGAGGTTTTATCAAAGTAAGACAGTATGAACAGATACCCTTAGAAATCTGTGGACATAAAGCTATAGGTACAGTATTAGTAGGACCTACACCKGTCAACATAATTGGAAGAAATCTGTTGACTCAGATTGGTTGTACTTTAAAYTTTCCCATTAGTCCTATTGAAACTGTACCAGTACAATTAAAGCCAGGRATGGATGGCCCAAAGRTTAAACAATGGCCATTGACAAAAGAAAAAATAGAAGCATTAACAGCAATTTGTGAT…
>072609_160728_URF_0107
TGGCAACGACCCCTTGTCACAATAAAAATAGGAGGACAGCTAAAAGAAGCTCTATTAGATACAGGAGCAGATGATACAGTATTAGAAGATATAAATTTGCCAGGAAAATGGAAACCAAAAATGATAGGGGGAATTGGAGGTTTTATCAAGGTAAGGCAATATGAACAGATACTTATAGAAATTTGTGGAAAAAAGGCTATAGGTACAGTATTAGTAGGACCTACACCTGTCAACATAATTGGACGAAATATGTTAACTCAGCTTGGTTGTACTTTAAATTTCCCAATTAGTCCTATTGACACTGTACCAGTAACATTAAAGCCAGGAATGGATGGACCAAGGGTTAAACAATGGCCATTGACAAAAGAGAAAATAGAAGCATTAACAGCAATTTGTGAT…
>0107_110101_161103_URF_0107
TGGCAGCGACCCGTTGTCACAGTTAGAATAGAAGGACAGCTGAGAGAAGCTCTATTAGATACAGGAGCAGATGATACAGTATTAGAAGATATAAATTTGCCAGGAAAATGGAAACCAAAAATGATAGGGRGAATTGGAGGTTTTATYAAAGTAAGGCAATATGATCAGATACGTATAGAAATTTGTGGAAAACAGGCTATAGGTACAGTGTTAGTAGGACCTACACCTGTCAACATAATTGGAMGAAATATGTTGACTCAAGTTGGTTGTACTTTAAATTTTCCAATTAGTCCTATTGAAACTGTACCAGTAAAAYTAAAGCCAGGAATGGATGGCCCAAAGGTTAAACARTGGCCATTGACARAAGAAAAAATARAAGCATTAACAGCAATTTGTGAT…
>120608_161208_URF_BC
TGGCAACGACCCATCGTCACAATAAAGGTAGGAGGGCAGTTAAAGGAAGCTCTATTAGATACAGGAGCAGATGATACAGTATTAGAAGACATAAATTTGCCAGGGAAGTGGAAACCAAAAATGATAGGGGGAATTGGAGGCTTTATCAAAGTAAAAGAGTATGAAGARGTACCCATAGAAATYAGTGGACACCAAGTTATAGGTACAGTGTTAGTGGGATCTACACCTGTCAACATTATTGGAAGAAATCTGTTGACTCAGCTTGGKTGCACTTTAAATTTTCCAATCAGTCCCATTGACACTGTACCAGTAAAATTAAAGCCAGGAATGGATGGCCCAAAGGTTAAACAATGGCCATTGACGGAAGAGAAAATAAAAGCATTAACAGCAATCTGTGAT…
>122713_161229_URF_0107
TGGCAACGACCCCTTGTCACAGTAAAAATAGGAGGACAGCTAAAAGAAGCTCTACTAGATACAGGAGCAGATGATACAGTATTAGAAGATATAGATTTGCCAGGAAAATGGAAACCAAGAATGATAGGGGGAATTGGAGGTTTTATCAAAGTAAGACAGTATGAACAGATACCCTTAGAAATCTGTGGACATAAAGCTATAGGTACAGTATTAGTAGGACCTACACCTGTCAACATAATTGGAAGAAATCTGTTGACTCAGATTGGTTGTACTTTAAACTTTCCCATTAGTCCTATTGAAACTGTACCAGTACAATTAAAGCCAGGAATGGATGGCCCAAAGGTTAAACARTGGCCATTGACAAAAGAAAAAATAGAAGCATTAACAGCAATTTGTGAT…
>302648_160421_URF_0107
TGGCAGCGACCCCTTGTCACAGTAAAAATAGAAGGACAGATGATAGAAGCTCTGTTAGATACAGGAGCAGATGATACAGTATTAGAAGATATAAATTTGCCAGGAAAATGGAGACCAAAAATGATAGGGGGAATTGGAGGTTTTATCAAGGTAAGGCAATATGATCAGATACTTATAGAAATTTGTGGGAAAAAGGCTACAGGTACAGTGTTAGTAGGACCTACACCTGTCAACATAATTGGACGAAATATGTTGACTCAGATTGGTTGTACTTTAAATTTCCCAATTAGTCCTATTGACACTATACCAGTAACATTAAAGCCAGGAATGGATGGCCCAAAGGTTAAACAATGGCCATTAACAGAAGAAAAAATAAAAGCATTAAAAGAAATTTGTGAT…
>303155_170215_URF_0107
TGGCAACGACCCCTTGTCACAGTAAAAATAGGGGGACAACTAAAAGAAGCTCTATTAGATACAGGAGCAGATGATACAGTATTAGAAGATATAAATTTACCAGGAAAATGGAAACCAAAAATGATAGGGGGAATTGGAGGTTTTATCAAAGTAAGGCAATATGAGCAGATACTTATAGAGATTTGTGGAAAACAGGCTATAGGTACAGTGTTAGTAGGACCTACACCTGTCAACATAATTGGACGAAACATGTTGACTCAAATTGGTTGTACTTTAAATTTCCCCATTAGTCCTATTGAAACTGTACCAGTACAACTAAAGCCAGGAATGGATGGCCCAAAGGTTAAACAATGGCCATTGACAAAAGAAAAAATAGAAGCATTAACAGCAATTTGTGAT…
>303154_170215_URF_0107
TGGCAACGACCCCTTGTCACAGTAAAAATAGGGGGACAACTAAAAGAAGCTCTATTAGATACAGGAGCAGATGATACAGTATTAGAAGATATAAATTTGCCAGGAAAATGGAAACCAAAAATGATAGGGGGAATTGGAGGTTTTATCAAAGTAAGGCAATATGAGCAGATACTTATAGAGATTTGTGGAAAACAGGCTATAGGTACAGTGTTAGTAGGACCTACACCTGTCAACATAATTGGACGAAACATGTTGACTCAAATTGGTTGTACTTTAAATTTCCCCATTAGTCCTATTGAAACTGTACCAGTACAACTAAAGCCAGGAATGGATGGCCCAAAGGTTAAACAATGGCCATTGACAAAAGAAAAAATAGAAGCATTAACAGCAATTTGTGAT…
>303174_170301_URF_0107
TGGCAACGACCCCTTGTCCCAATAAAGATAGGGGGGCAAGTAAAGGAAGCTCTATTAGATACAGGAGCAGATGATACAGTATTAGAAGACATGAATTTGCCAGGGAAATGGAAACCAAAAATGATAGGGGGAATTGGAGGTTTTATCAAAGTAAGACAGTATGATCARATACCCATAGAAATCTGTGGACATAAAGCTATAGGCACAGTATTAATAGGACCTACACCTGTCAACATAATTGGAAGAAATCTGTTGACTCAGCTTGGGTGCACTTTAAATTTTCCAATCAGTCCTATTGAAACTGTACCAGTAAAACTAAAGCCAGGAATGGATGGCCCAAAGGTTAAACAATGGCCACTGACAAAAGAGAAAATAGAAGCATTAATGGCAATTTGTGAT…
>021427_170216_URF_0107
TGGCAACGACCCCTTGTTACCATAAAGATAGGGGGGCAATTAAAGGAGGCTCTATTAGATACAGGAGCAGATGATACAGTATTAGAAGATATAAATTTGCCAGGAAAATGGAAACCAAAAATGATAGGGGGAATTGGAGGTTTTATCAAGGTAAGGCAATATGATCAGATACCTATAGAAATTTGTGGAAAAAAGGCTATAGGTACAGTGTTAGTAGGACCTACACCTATCAACATAATTGGAAGAAATCTGTTAACTCAGCTTGGTTGTACTTTAAATTTTCCAATCAGTCCTATTGAAACTGTACCAGTAAAACTAAAGCCAGGAATGGATGGCCCAAAGGTTAAACAATGGCCATTGACAAAAGARAAAATARAAGCATTAACAGCAATTTGTRAT…
>303303_170510_URF_0107
TGGCAGCGACCCTTAGTCACAGTAAAAATAGGAGGACAGCTAAAAGAAGCTCTATTAGATACAGGAGCAGATGATACAGTATTAGAAGATATAAATTTGCCAGGAAAATGGAAACCAAAAATGATAGGGGGAATTGGAGGCTTTATCAAAGTAAGACAATATGATCAGATACTTATAGAAATTTGTGGAAAAAAGGCTATAGGTACAGTATTAGTAGGACCTACACCTGTCAACATAATTGGACGAAATATGTTGACTCAGATTGGTTGTACTTTAAATTTCCCAATCAGTTCTATTGAAACTGTACCAGTAAAACTAAAGCCAGGAATGGATGGCCCAAAGGTTAAACAATGGCCATTGACAAAAGAGAAAATAGAAGCATTAACAGCAATTTGTGAT…
>303349_170621_URF_0107
TGGCAGCGACCAGTAGTCACAATAAAAGTAGAAGGACAGCTGAAAGAAGCTCTATTAGATACAGGAGCAGATGATACAGTATTAGAAGATATAAATTTGCCAGGAAAATGGAAACCAAAAATGATAGGGGGAATTGGAGGTTTTATCAAAGTAAGACAATATGATCAGATACTTATAGAAATTTGTGGAAAAAAGGCTATAGGTACAGTATTAGTAGGACCTACACCTGTCAACATAATTGGACGAAATATGTTGACTCAGMTTGGTTGTACTTTAAACTTTCCCATTAGTCCTATTGAAACTGTACCAGTACAATTAAAGCCAGGAATGGATGGCCCAAAGGTTAAACAATGGCCATTGACAAAAGAAAAAATAGAAGCATTAACAGMAATTTGTGAT…
>052317_170525_URF_0107
TGGCAACGACCCCTTGTCACAGTAAAAATAGGGGGACAACTAAAAGAAGCTCTATTAGATACAGGAGCAGATGATACAGTATTAGAAGATATAAATTTGCCAGGAAAATGGAAACCAAAAATGATAGGGGGAATTGGAGGTTTTATCAAGGTAAGGCAATATGATCAGATACTTATAGAAATTTATGGAAAAAGGGCTATAGGTACAGTGTTAGTAGGACCTACACCTGTCAACATAATTGGACGAAACATGTTGACTCAAATTGGTTGTACTTTAAATTTCCCCATTAGTCCTATTGAAACTGTACCAGTAAAACTAAAGCCAGGAATGGATGGCCCAAAGGTTAAACAATGGCCATTGACAAAAGAAAAAATAGAAGCATTAACAGCAATTTGCGAT…
>071803_170720_URF_0107
TGGCAACGACCCCTTGTCACAGTAAAAATAGGAGGACAGCTAAAAGAAGCTCTACTAGATACAGGAGCAGATGATACAGTATTAGAAGATATAGATTTGCCAGGAAAATGGAAACCAAGAATGATAGGGGGAATTGGRGGTTTTATCAAAGTAAGACAGTATGAACAGATACCCTTAGAAATCTGTGGACACAAAGCTATAGGTACAGTATTAGTAGGACCTACACCTGTCAACATAATTGGAAGAAATCTGTTGACTCAGATTGGTTGTACTTTAAACTTTCCCATTAGTCCTATTGAAACTGTACCAGTACAATTAAAGCCAGGAATGGATGGCCCAAAGGTTAAACAATGGCCATTGACAAAAGAAAAAATAGAAGCATTAACAGCAATTTGTAAT…
>304176_181219_URF_0107
TGGCAACGACCCCTTGTYACMATAAAARTAGGGGGASAAATAAGGGAAGCTCTATTAGATACAGGAGCAGATGATACAGTATTRGAAGAYATRAATTTGCCAGGAAAATGGAAACCAAAAATGATAGGGGGAATTGGAGGTTTTATCAARGTAARRCARTATGAACAGATACYYATAGAAATCTGTGGACARAAGGCTATAGGTACAGTATTAGTAGGACCTACACCTGTCAAYATAATTGGAMGAAATMTRTTGACTCAGCTTGGTTGTACTTTAAATTTYCCAATYAGYCCTATTGAMACTGTACCAGTAACAYTAAAGCCAGGAATGGATGGMCCAAAGGTTAAACARTGGCCATTRACARAAGAAAAAATARAAGCATTAACMGMAATTTGTRAW…
>303658_180104_URF_0107
TGGCAACGACCCCTTGTCACAGTAAAAATAGGGGGACAACTAAAAGAAGCTCTATTAGATACAGGAGCAGATGATACAGTATTAGAAGATATAAACTTGCCAGGAAAATGGAAACCAAAAATGATAGGGGGAATTGGAGGTTTTATCAAAGTAAGGCAATATGAGCAGATACTTATAGAGATTTGTGGAAAACAGGCTATAGGTACAGTGTTAGTAGGACCTACACCTGTCAACATAATTGGACGAAATATGTTGACTCAAATTGGTTGTACTTTAAATTTCCCCATTAGTCCTATTGAAACTGTACCAGTAAACTTAAAGCCAGGAATGGATGGCCCAAAGGTTAAACAATGGCCATTGACAAAAGAAAAAATAGAAGCATTAACAGCAATTTGTGAT…
>303348_170620_URF_0107
TGGCAACGACCCCTTGTCACAATAAAAATAGGGGGACAACTAAAAGAAGCTCTATTAGATACAGGAGCAGATGATACAGTATTAGAAGATATAAATTTGCCAGGAAAATGGAAACCAAAAATGATAGGGGGAATTGGAGGTTTTATCAAAGTAAGGCAATATGATCAGATACTTATAGAAATTTGTGGAAAAAAGGCTATAGGTACAGTATTAGTAGGACCTACACCTGTCAACATAATTGGACGAAATATGTTGACTCAAATTGGTTGTACTTTAAATTTTCCAATCAGTCCTATTGACACTGTACCAGTAAAATTAAAGCCAGGAATGGATGGACCAAAGGTTAAACAGTGGCCATTGACAGAAGAAAAAATAAAAGCATTAACAGAAATTTGTAAA…
>303757_180313_URF_0107
TGGCAACGACCCCTTGTCACAGTAAGAATAGAAGGACAGCTGAGAGAAGCTCTATTAGATACAGGGGCAGATGATACAGTATTAGAAGATATAAATTTGCCAGGAAAATGGAAACCAAAAATGATAGGGGGAATTGGAGGTTTTATCAAAGTAAAGCAATATGATCAGATACTTATAGAAATTTGTGGAAAAAAGGCTATAGGTACAGTGTTGGTAGGACCTACACCTGTCAACATAATTGGACGAAATATGTTGACTCAGCTTGGTTGTACTTTAAATTTTCCAATCAGTCCTATTGAMACTATACCAGTAAAACTAAAGCCAGGAATGGATGGCCCAAAGGTTAAACAATGGCCATTGACAAAAGAAAAAATAGAAGCATTAACAGCAATATGTGAT…
>032725_180329_URF_0107
TGGCAACGACCCCTTGTCACARTAAGAATAGAAGGACAGCTGARAGAAGCTCTATTAGATACAGGGGCAGATGATACAGTATTAGAAGATATAAATTTGCCAGGAAAATGGAAACCAAAAATGATAGGGGGAATTGGAGGTTTTATCAAAGTAAAGCAATATGATCAGATACTTATAGAAATTTGTGGAAAAAAGGCTATAGGTACAGTGTTGGTAGGACCTACACCTGTCAACATAATTGGACGAAATATGTTGACTCAGCTTGGTTGTACTTTAAATTTTCCAATCAGTCCTATTGAAACTATACCAGTAAAACTAAAGCCAGGAATGGATGGCCCAAAGGTTAAACAATGGCCATTGACAAAAGAAAAAATAGAAGCATTAACAGCAATATGTGAT…
>303914_180606_URF_0107
TGGCAACGACCCCTTGTTACCATAAAGATAGGGGGGCARTTAAAGGAAGCTCTATTAGATACAGGAGCAGATGATACAGTATTAGAAGATATAAATTTGCCAGGAAAATGGAAACCAAAAATGATAGGGGGAATTGGAGGTTTTATCAAGGTAAGGCAATATGATYAGATACCTATAGAAATTTGTGGAAAAAARGCCATRGGTACAGTGTTRGTAGGACCTACACCTATCAACATAATTGGAAGAAATCTGTTAACTCAGCTTGGTTGTACTTTAAATTTTCCAATCAGTCCTATTGAAACTGTACCAGTAAAACTAAARCCAGGAATGGATGGCCCAAAGGTTAAACAATGGCCATTGACAAAAGAGAAAATAGAGGCATTAACAGCAATTTGTGAT…
>304006_180808_URF_0107
TGGCAACGACCCCTWGTCACAGTAAAAATAGGGGGACAACTAAAAGAAGCTCTATTAGATACAGGAGCAGATGATACAGTATTAGAAGATATAAATTTGCCAGGAAAATGGAAACCAAAAATGATAGGGGGAATTGGAGGTTTTATCAAAGTAAGGCAATATGAGCAGATACTTMTAGAKATTTGTGGAAAACAGGCTATAGGTACAGTGTTAGTAGGACCTACACCTGTCAACATAATTGGACGAAACATGTTGACTCAAATTGGTTGTACTTTAAATTTYCCCATTAGTCCTATTGAAACTGTACCAGTAAAACTAAAGCCAGGAATGGATGGCCCAAAGGTTAAACAATGGCCATTGACAAAAGAAAAAATAGAAGCATTAACAGCAATTTGTGAT…
>304143_181205_URF_0107
TGGCAACGACCCCTTGTCACAGTAAAAATAGGAGGACAGTTAAAAGAAGCTCTATTAGATACAGGAGCAGATGATACAGTATTAGAAGATATAAATCTGCCAGGAAAATGGAAACCAAAAATGATAGGGGGAATTGGAGGTTTTATCAAGGTAAGACAATATGATCAGATACTTATAGAAATTTGTGGAAAAAGGGCTATAGGTACAGTATTGGTAGGACCTACACCTGTCAACATAATTGGACGAAATATGTTGACTCAGATTGGCTGTACTTTAAATTTCCCAATTAGTCCTATTAATACTGTACCAGTAACATTAAAGCCAGGAATGGATGGACCAAAGGTTAAACAATGGCCATTGACAAAAGAGAAAATAGAAGCATTAACAGCAATTTGTGAT…
>304195_190103_URF_0107
TGGCAACGACCCCTTGTTACCATAAAGATAGGGGGGCAAATAAAGGAAGCTCTATTAGATACAGGAGCAGATGATACAGTATTAGAAGACATGAATTTGCCAGGGAAATGGAAACCAAAAATGATAGGGGGAATTGGAGGTTTTATCAAAGTAAGACAGTATGAACAGATACCCATAGAAATCTGTGGACAGAAGGCTATAGGTACAGTATTAGTAGGACCTACACCTGTCAACATAATTGGAAGAAATCTGTTGACTCAGCTTGGTTGTACTTTAAATTTTCCAATCAGTCCTATTGAAACTGTACCAGTAAAACTAAAACCAGGAATGGATGGCCCAAAGGTTAAACAATGGCCATTGACAAAAGAAAAAATAGAAGCATTAACAGCAATTTGTGAT…
>303693_180124_URF_0107
TGGCAACGACCCCTTGTCACAATAAAAATAGGAGGACAGCTAAGAGAAGCTCTATTAGATACAGGAGCAGATGATACAGTATTAGAAGACATGAATTTGCCAGGGAAATGGAAACCAAAAATGATAGGGGGAATTGGAGGTTTTATCAAGGTAAGGCAATATGATCAGATACCAATAGAAATTTGTGGAAAAAGGGCTATAGGTACGGTGTTAATAGGACCTACACCTATCAACATAATTGGACGGAATATGTTGACTCAGCTTGGTTGTACTTTAAATTTTCCAATCAGTCCTATTGAAACTGTACCAGTAAAATTAAAGCCAGGAATGGATGGCCCAAAGGTTAAACAATGGCCATTGTCAAAAGAGAAAATAGAGGCATTAACAGCAATTTGTGAG…
>303918_180607_URF_0107
TGGCAACGACCCCTTGTCACAGTAAAAATAGGGGGACAACTAAAAGAAGCTCTATTAGATACAGGAGCAGATGATACAGTATTAGAAGATATAAATTTGCCAGGAAAATGGAAACCAAAAATGATAGGGGGAATTGGAGGTTTTATCAAAGTAAGGCAATATGAGCAGATACTTATAGAGATTTGTGGAAAACAGGCTATAGGTACAGTGTTAGTAGGACCTACACCTGTCAACATAATTGGACGAAACATGTTGACTCAAATTGGTTGTACTTTAAATTTCCCCATTAGTCCTATTGAAACTGTACCAGTACAACTAAAGCCAGGAATGGATGGCCCAAAGGTTAAACAATGGCCATTGACAAAAGAAAAAATAGAAGCATTAACAGCAATTTGCGAT…
>304210_190122_URF_0107
TGGCAACGACCCCTTGTCACAATAAAAATAGGAGGACAGCTAAAAGAAGCTCTACTAGATACAGGAGCAGATGATACAGTATTAGAAGATATAAATTTGCCAGGAAAATGGAAACCAAAAATGATAGGGGGAATTGGAGGTTTTATCAAAGTAAGGCAATATGATCAGATACTTATAGAAATTTGTGGAAAAAAGGCTATAGGTACAGTGTTAGTAGGACCTACACCTGTCAACATAATTGGACGAAATATGTTGACTCAGATTGGTTGTACTTTAAATTTCCCAATTAGYCCTRTTGACACTRTACCAGTAACATTAAAGCCAGGMATGGATGGMCCAAAGRTTAAACARTGGCCATTGACRRAAGARAAAATARAAGCATTAAYAGMAATTTGTRAK…
>304215_190122_URF_0107
TGGCAACGACCCCTTGTCACAATAAAGATAGGGGGACAATTGAAGGAAGCTCTATTAGATACAGGAGCAGATGATACAGTATTRGAAGAYATRAATTTGCCAGGRAAATGGAAACCAAAAATGATAGGGGGAATTGGAGGTTTTATCAARGTAARRCARTATGATCAGATACYYATAGAAATYTGTGGAMARAAGGCTATAGGTACAGTGTTAGTAGGACCTACACCTGTCAATATAATTGGAAGAAATATATTGACTCAGCTTGGTTGTACTTTAAATTTCCCAATTAGCCCTATTGACACTGTACCAGTAACATTAAAGCCAGGAATGGATGGACCAAAGGTTAAACAGTGGCCATTAACAGAAGAAAAAATAAAAGCATTAACAGAAATTTGTAAA…
>304225_190212_URF_0107
TGGCAACGACCCCTTGTTGCAATAAAAGTAGGAGGACAGATGAGAGAAGCTCTATTAGATACAGGAGCAGATGATACAGTATTAGAAGATATAAATTTGCCAGGAAAATGGAAACCAAAAATGATAGGGGGAATTGGAGGTTTTATCAAGGTAARGCAATATGATCAGRTATCTATAGAWATTTGTGGAAAAAGRGCTATAGGTACAGTRTTAGTAGGACCCACACCTATCAAYATAATTGGAAGAAATMTGTTGACTCAGMTTGGTTGTACTTTAAATTTYCCAATYAGTCCTATTGAAACTGTACCAGTAAAACTAAAGCCAGGAATGGATGGCCCAAAGGTTAAACAATGGCCATTGACAAAAGAAAAAATAGAAGCATTAACAGCAATTTGTGAT…
>304355_190423_URF_0107
TGGCAACGACCTCTTGTTACCATAAAGATAGGGGGGCAATTAAAGGAAGCTCTATTAGATACAGGAGCAGATGATACAGTATTAGAAGATATAAATTTGCCAGGAAAATGGAAACCAAAAATGATAGGGGGAATTGGAGGTTTTATYAAGGTAAGGCAATATGATCAGATACCCATAGAAATTTGTGGAAAAAAGGCCATAGGTACAGTGTTAGTAGGACCTACACCTATCAACATAATTGGAAGAAATCTGTTAACTCAGCTTGGTTGTACTTTAAATTTTCCAATCAGTCCTATTGAAACTGTACCAGTAAAACTAAAGCCAGGAATGGATGGCCCAAAGGTTAAACAATGGCCATTGACAAAAGAGAAAATAGAGGCATTAACAGCAATTTGTGAT…
>090305_190905_URF_01B
TGGCAACGACCCCTTGTCACAGTAAAAATAGGAGGACAGTTGAAAGAAGCTCTATTAGATACAGGAGCAGATGATACAGTATTGGAAGATATAAATTTGCCAGGAAAATGGAAACCAAAAATGATAGGGGGAATTGGAGGTTTTATCAAAGTAAGGCAATATGATCAGATACTCATAGAAATTTGTGGGAAAAAGGCTATAGGTACAGTGTTAGTAGGACCTACACCTGTTAACATAATTGGACGAAATATGTTGACTCAGATTGGTTGTACTTTAAACTTCCCAATTAGTCCTGTTGACACTGTACCAGTAACATTAAAGCCAGGAATGGATGGCCCAAGAGTTAAACAATGGCCACTGACAGAAGAAAAAATAAAAGCTTTAGTAGAAATTTGTACA…
>091005_190912_URF_0107
TGGCAACGACCCGTTGTCACAGTAAGAATAGAAGGACAGCTGAAAGAAGCTCTATTAGATACAGGAGCAGATGATACAGTATTAGAAGATATAAATTTACCAGGAAAATGGAAACCAAAAATGATAGGGGGAATTGGAGGTTTTATCAAAGTAAGGCAATATGATCAGATACTTATAGAAATTTGTGGGAAAAAAGCTATAGGTACAGTGTTAGTAGGACCTACACCTGTCAACATAATTGGACGAAATATGTTGACTCAGATTGGTTGTACTCTAAATTTTCCAATCAGTCCTATTGAAACTGTACCAGTAAAACTAAAGCCAGGAATGGATGGTCCAAAGGTTAAACAATGGCCATTGACAAAAGAAAAAATAGAAGCATTAACAGCAATTTGTGAT…
>092420_190926_URF_0107
TGGCAACGACCCCTTGTCACAATAAAGATAGGAGGGCAATTAAAGGAAGCTCTATTAGATACAGGAGCAGATGATACAGTATTAGAAGACATGGATTTGCCAGGGAAATGGAAACCAAAAATGATAGGGGGAATTGGAGGTTTTATCAAGGTAAGACAGTATGATCARATACCCATAGAAATCTGTGGACATAAAGCTATAGGTACAGTATTAGTGGGACCTACACCTATAAACATAATTGGAAGAAATCTGTTGACTCAGCTTGGTTGTACTTTAAATTTTCCAATCAGTCCTATTGAAACTGTACCAGTAAAACTAAAGCCAGGAATGGATGGCCCAAAGGTTAAACAATGGCCATTAACAAAAGAGAAAATAGAAGCATTAACAGCAATTTGTGAT…
>092408_190926_URF_0107
TGGCAACGACCCCTTGTTACCATAAAGATAGGGGGGCAATTAAAGGAAGCTCTATTAGATACAGGAGCAGATGATACAGTATTAGAAGAGATAAATTTGCCAGGAAAATGGAAACCAAAAATGATAGGGGGAATTGGAGGTTTTATCAAGGTAAGGCAATATGATCAGATACCTATAGAAATTTGTGGAAAAAAGGCCATAGGTACAGTGTTAGTAGGACCTACACCTATCAACATAATTGGAAGAAATCTGTTAACTCAGCTTGGTTGTACTTTAAATTTTCCAATCAGTCCTATTGAAACTGTACCAGTAAAACTAAAGCCAGGAATGGATGGCCCAAAGGTTAAACAATGGCCATTGACAAAAGAGAAAATAGAGGCATTAACAGCAATTTGTAAT…
>321868_170309_URF_0107
TGGCAACGACCCCTTGTCACAGTAAAAATAGGAGGACAGCTAAAAGAAGCTCTACTAGATACAGGAGCAGATGATACAGTATTAGAAGATATAGATTTGCCAGGAAAATGGAAACCAAGAATGATAGGGGGAATTGGAGGTTTTATCAAAGTAAGACAGTATGAACAGATACCCTTAGAAATCTGTGGACATAAAGCTATAGGTACAGTATTAGTAGGACCTACACCTGTCAACATAATTGGAAGAAATCTGTTGACTCAGATTGGTTGTACTTTAAACTTTCCCATTAGTCCTATCGAAACTGTACCAGTACAATTAAAGCCAGGAATGGATGGCCCAAAGGTTAAACAATGGCCATTGACAAAAGAAAAAATAGAAGCATTAACAGCAATTTGTAAT…
>303374_170705_URF_0107
TGGCAACGACCCCTTGTCACAATAAAAATAGAAGGACAGCTAAAAGAAGCTCTATTAGATACAGGAGCAGATGATACAGTATTAGAAGATATAAATCTGCCAGGAAAATGGAAACCAAAAATGATAGGGGGAATTGGAGGTTTTATCAAGGTAAGGCAATATGATCAGATACTTATAGAAATTTGTGGAAAAAAGGCTATAGGTGCAGTATTAGTAGGACCTACACCTGTCAACATAATTGGACGAAATATGTTGACTCAGCTTGGTTGTACTTTAAATTTCCCAATTAGTCCTATTGACACTGTACCAGTAACATTAAAGCCAGGAATGGATGGACCAAAGGTTAAACAATGGCCATTGACAAAAGAGAAAATAGAAGCATTAACAGCAATTTGTGAT…
>303526_171019_URF_0107
TGGCAACGACCCCTTGTCACAATAAAAATAGGAGGACAGATGAGAGAAGCTCTATTAGATACAGGAGCAGATGATACAGTATTAGAAGATATAAATTTGCCAGGAAAATGGAAACCAAAAATGATAGGGGGAATTGGAGGTTTTATCAAGGTAAGGCAATATGATCAGATATCTATAGAAATTTGTGGAAAAAAGGCTATAGGTACAGTGTTAGTAGGACCTACACCTGTCAACATAATTGGACGAAATATGTTGACTCAGATTGGTTGTACTTTAAATTTCCCAATTAGCCCTATTGACACTGTACCAGTAACATTAAAGCCAGGGATGGATGGCCCAAAGGTTAAACAATGGCCATTGACAAAAGAAAAAATAGAAGCATTAACAGCAATTTGTGAT…
>303614_171212_URF_0107
TGGCAACGACCCGTTGTCGCAGTGARAATAGAAGGACAGCTGAAAGAAGCTCTATTAGATACAGGGGCAGATGATACAGTATTAGAAGATATAGATTTGCCAGGAAAATGGAAACCAAAAATGATAGGGGGAATTGGAGGTTTTATCAAAGTAAGGCAATATGATCAGATACATATAGAAATTTGTGGAAAACAGGCTATAGGTACAGTGTTAGTAGGACCTACACCTGTCAACATAATTGGACGAAATATGTTGACTCAGATTGGTTGTACTTTAAATTTTCCAATCAGTCCTATTGAAACTGTACCAGTAAAACTAAAGCCAGGAATGGATGGCCCAAAGGTTAAACAATGGCCATTGACAAAAGAGAAAATAGAAGCATTAACAGCAATTTGTGAW…
>303649_171228_URF_0107
TGGCAACGACCCCTTGTCACAGTAAAAATAGGGGGACAACTAAAAGAAGCTCTATTAGATACAGGAGCAGATGATACAGTATTAGAAGATATAAATTTGCCAGGAAAATGGAAACCAAAAATGATAGGGGGAATTGGAGGTTTTATCAAGGTAAGGCAATATGATCAGATACTTATAGAAATTTATGGAAAAAGGGCTATAGGTACAGTGTTAGTAGGACCTACACCTGTCAACATAATTGGACGAAACATGTTGACTCAGATTGGTTGTACTTTAAATTTCCCCATTAGTCCTATTGAAACTGTACCAGTAAAACTAAAGCCAGGAATGGATGGCCCAAAGGTTAAACAATGGCCATTGACAAAAGAAAAAATAGAAGCATTAACAGCAATTTGTGAT…
>303397_170712_URF_0107
TGGCAACGACCCCTTGTCACAGTAAAAATAGRRGGACAACTAAAAGAAGCTCTATTAGATACAGGAGCAGATGATACAGTATTAGAAGATATAAATTTGCCAGGAAAATGGAAACCAAAAATGATAGGGGGAATTGGAGGTTTTATCAAAGTAAGGCAATATGAGCAGATACTTATAGAGATTTGTGGAAAACAGGCTATAGGTACAGTGTTAGTAGGACCTACACCTGTCAACATAATTGGACGAAACATGTTGACTCAGCTTGGTTGTACTTTAAATTTCCCCATTAGTCCTATTGAAACTGTACCAGTAAAATTAAAGCCAGGAATGGATGGCCCAAAGGTTAAACAATGGCCATTGACAAAAGAAAAAATAGAAGCATTAACAGCAATTTGTGAT…
>071825_160721_URF_0107
TGGCAACGACCCGTTGTCACAGTAAGAATAGAAGGACAGCTGAAAGAAGCTCTATTAGATACAGGAGCAGATGATACAGTATTAGAAGATATAAATTTGCCAGGAAAATGGAAACCAAAAATGATAGGGGGAATTGGAGGTTTTATCAAAGTAAGGCAATATGAGCAGATACTTATAGAAATTTGTGGAAAACAGGCTATAGGTACAGTGTTAGTAGGACCTACACCTGTCAACATAATTGGACGAAACATGTTGACTCAGCTTGGTTGTACTTTAAATTTTCCAATCAGTCCTATTGAAACTGTACCAGTAAAACTAAAGCCAGGAATGGATGGCCCAAAGGTTAAACAATGGCCATTGACAAAAGAAAAAATAGAAGCATTAACAGCAATTTGTGAT…
>302972_161201_URF_0107
TGGCAACGACCCCTCGTCACAATAAAAGTAGAAGGACAGATAAAAGAAGCTCTATTAGATACAGGAGCAGATGATACAGTATTAGAAGATATAAATTTGCCAGGAAAATGGAAACCAAAAATGATAGGGGGAATTGGAGGTTTTATCAAGGTAAGGCAATACGATCAGATACTTATAGAAATTTGTGGAAAAAGGGCTATAGGTACAGTGTTAGTAGGACCTACACCTGTCAACATAATTGGACGAAATATGTTGACTCAGCTTGGTTGTACTTTAAATTTCCCAATTAGCCCTATTGACACTGTACCAGTAAATCTAAAGCCAGGAATGGATGGCCCAAAGGTTAAACAATGGCCATTGACAAAAGAGAAAATAGAAGCATTAACAGCAATTTGTGAG…
>011005_170112_URF_0107
TGGCAACGACCCCTTGTCACAATAAAAATAGGAGGACAGCTAAGAGAAGCTCTATTAGATACAGGAGCAGATGATACAGTATTAGAAGATATAAATTTGCCAGGAAAATGGAAACCRAAAATGATAGGGGGAATTGGAGGTTTTATCAAGGTAAAGCAATATGATCAGATACTTATAGAAATTTGTGGAAAAAGGGCTATAGGTACAGTRTTAGTAGGACCTACACCTGTCAACATAATTGGRCGAAATATGTTGACTCAGATTGGWTGTACTTTAAATTTYCCAATTAGYCCTATTGACACTRTACCAGTAACATTAAARCCAGGAATGGATGGACCAAAGGTTAAACARTGGCCATTGACARAAGAGAAAATAGAAGCATTAACAGCAATTTGTGAT…
>031430_170316_URF_0107
TGGCAACGACCCCTTGTCACAATAAAAATAGAAGGACAGCTAAAAGAAGCTCTATTAGATACAGGAGCAGATGATACAGTACTAGAAGATATAAATTTGCCAGGAAAATGGAAACCAAAAATGATAGGGGGAATTGGAGGTTTTATCAAAGTAAGGCAATATGATGAGATACTTATAGAAATTTGTGGAAAAAAGGCTGTAGGTACAGTGTTAGTAGGACCTACACCTGTCAACATAATTGGACGAAATATGTTGACTCAGCTTGGWTGTACTCTAAATTTTCCAATCAGTCCTATTGATACTGTACCAGTAAAATTAAAGCCAGGAATGGATGGCCCAAAGGTTAAACAATGGCCATTGACAAAAGAGAAAATAGAAGCATTAACAGCAATTTGTAAG…
>031401_170316_URF_0107
TGGCAACGACCCCTTGTCACAATAAARATAGGGGGGCAARTAAAAGAAGCTCTATTAGATACAGGAGCAGATGATACAGTATTAGAAGAMATRAATTTGCCAGGRAAATGGAAACCAAAAATGATAGGGGGAATTGGAGGTTTTATCAAAGTAAGGCAATATGATCAGATACYYATAGAAATTTGTGGRAAAAARGCTATAGGTACAGTRTTAGTAGGACCTACACCTGTCAACATAATTGGAAGAAATATGTTGACTCAGMTTGGTTGTACTTTAAATTTTCCAATYAGTCCTATTGAMACTGTACCAGTAAMATTAAARCCAGGAATGGATGGMCCAAAGGTTAAACAGTGGCCATTRACAGAAGAAAAAATARAAGCATTAACAGAAATTTGTRAW…
>050814_180510_URF_0107
TGGCAACGACCCGTTGTCACAGTTAGAATAGAAGGACAGCTGAAAGAAGCTCTATTAGATACAGGGGCAGATGATACAGTATTAGAAGAGATAAATTTGCCAGGAAAATGGAAACCAAAAATGATAGGGGGAATTGGRGGTTTTATCAAAGTAAGGCAATATGATCAGATACTTATAGAAATTTGTGGAAAACAGGCTACAGSTACAGTGTTAGTAGGACCTACACCTGTCAACATAATTGGACGAAATATRTTGACTCAGATTGGTTGTACTTTAAATTTTCCAATCAGTCCTATTGAAACYGTACCAGTAAAACTAAAGCCAGGAATGGATGGCCCAAAGGTTAAACAATGGCCATTGACAAAAGAGAAAATAGAAGCATTAACAGCAATTTGTGAT…
>102313_181025_URF_0107
TGGCAACGACCCCTCGTCACAATAAAAGTAGAAGGACAGATAAAAGAAGCTCTATTAGATACAGGAGCAGATGATACAGTATTAGAAGATATAAATTTGCCAGGAAAATGGAAACCAAAAATGATAGGGGGAATTGGAGGTTTTATCAAGGTAAGGCAATATGATCAGATACTTATAGAAATTTGTGGAAAAAGGGCTATAGGTACAGTGTTAGTAGGACCTACACCTGTCAACATAATTGGACGAAAYATGTTGACACAGCTTGGTTGTACTTTAAATTTCCCAATTAGCCCTATTGACACTGTACCAGTAAATCTAAAGCCAGGAATGGATGGCCCAAAGGTTAAACAATGGCCATTGACAAAAGAGAARATAGAAGCATTAACAGCAATTTGTGAG…
>103014_181101_URF_0107
TGGCAACGACCCCTCGTCACAATAAAAGTAGAAGGACAGATAAAAGAAGCTCTATTAGATACAGGAGCAGATGATACAGTATTAGAAGATATAAATTTGCCAGGAAAATGGAAACCAAAAATGATAGGGGGAATTGGAGGTTTTATYAAGGTAAGGCAATATGATCAGATACTTATAGAAATTTGTGGAAAAAGGGCTATAGGTACAGTGTTAGTAGGACCTACACCTGTCAACATAATTGGACGAAAYATGTTGACACAGCTTGGTTGTACTTTAAATTTCCCAATTAGCCCTATTGACACTGTACCAGTAAATCTAAAGCCAGGAATGGATGGCCCAAAGGTTAAACAATGGCCATTGACAAAAGAGAARATAGAAGCATTAACAGCAATTTGTGAG…
>304131_181121_URF_0107
TGGCAGCGACCCCTAGTCACAATAAAAATAGGAGGACAGCTGAAAGAAGCTCTATTAGATACAGGAGCAGATGATACAGTATTAGAAGATATAAATTTGCCAGGAAAATGGAAACCAAAAATGATAGGGGGAATTGGAGGTTTTATCAAAGTAAGGCAATATGATCAGATACTTATAGAAATTTGTGGAAAAAAGGCTATAGGTACAGTGTTAGTAGGACCTACACCTGTCAACATAATTGGACGAAATATGTTGACTCAAATTGGTTGTACTTTGAATTTTCCAATTAGTCCTATTGACACTGTACCAGTAAAATTAAAACCAGGAATGGATGGACCAAAGGTTAAACAATGGCCATTGACAAAAGAAAAAATAGAAGCATTAACAGCAATTTGTGAT…
>130063_181127_URF_0107
TGGCAACGACCCCTCGTCACAATAAAAGTAGAAGGACAGATAAAAGAAGCTCTATTAGATACAGGAGCAGATGATACAGTATTAGAAGATATAAATTTGCCAGGAAAATGGAAACCAAAAATGATAGGGGGAATTGGAGGTTTTATCAAGGTAAGGCAATATGATCAGATACTTATAGAAATTTGTGGAAAAAGGGCTATAGGTACAGTGTTAGTAGGACCTACACCTGTCAACATAATTGGACGAAATATGTTGACACAGCTTGGTTGTACTTTAAATTTCCCAATTAGCCCTATTGACACTGTACCAGTAAATCTAAAGCCAGGAATGGATGGCCCAAAGGTTAAACAATGGCCATTGACAAAAGAGAAAATAGAAGCATTAACAGCAATTTGTGAG…
>619025_190212_URF_0107
TGGCAACGACCCCTCGTCACAATAAAAGTAGAAGGACAGATAAAAGAAGCTCTATTAGATACAGGAGCAGATGATACAGTATTAGAAGATATAAATTTGCCAGGGAAATGGAAACCAAAAATGATAGGGGGAATTGGAGGTTTTATCAAGGTAAGGCAATATGATCAGATACTTATAGAAATTTGTGGAAAAAGGGCTATAGGTACAGTGTTAGTAGGACCTACACCTGTCAACATAATTGGACGAAATATGTTGACACAGCTTGGTTGTACTTTAAATTTCCCAATTAGCCCTATTGACACTGTACCAGTAAATCTAAAGCCAGGAATGGATGGCCCAAAGGTTAAACAATGGCCATTGACAAAAGAGAAGATAGAAGCATTAACAGCAATTTGTGAG…
>323756_190430_URF_0107
TGGCAACGACCCCTCGTCACAATAAAAGTAGAAGGACAGATAAAAGAAGCTCTATTAGATACAGGAGCAGATGATACAGTATTAGAAGATATAAATTTGCCAGGAAAATGGAAACCAAAAATGATAGGGGGAATTGGAGGTTTTATTAAGGTAAGGCAATATGATCAGATACTTATAGAAATTTGTGGAAAAAGGGCTATAGGTACAGTGTTAGTAGGACCTACACCTGTCAACATAATTGGACGAAACATGTTGACACAGCTTGGTTGTACTTTAAATTTCCCAATTAGCCCTATTGACACTGTACCAGTAAATCTAAAGCCAGGAATGGATGGCCCAAAGGTTAAACAATGGCCATTGACAAAAGAGAAAATAGAAGCATTAACAGCAATTTGTGAG…
>304410_190528_URF_0107
TGGCAACGACCCCTCGTCACAATAAAAGTAGAAGGACAGATAAAAGAAGCTCTATTAGATACAGGAGCAGATGATACAGTATTAGAAGATATAAATTTGCCAGGAAAATGGAAACCAAAAATGATAGGGGGAATTGGAGGTTTTATTAAGGTAAGGCAATACGATCAGATACTTATAGAAATTTGTGGAAAAAGGGCTATAGGTACAGTGTTAGTAGGACCTACACCTGTCAACATAATTGGACGAAATATGTTGACACAGCTTGGTTGTACTTTAAATTTCCCAATTAGCCCTATTGACACTGTACCAGTAAATCTAAAGCCAGGAATGGATGGCCCAAAGGTTAAACAATGGCCATTGACAAAAGAGAAGATAGAAGCATTAACAGCAATTTGTGAG…
>304556_190910_URF_0107
TGGCAACGACCCCTCGTCACAATAAAAGTAGAAGGACAGATAAAAGAAGCTCTATTAGATACAGGAGCAGATGATACAGTATTAGAAGATATAAATTTGCCAGGAAAATGGAAACCAAAAATGATAGGGGGAATTGGAGGTTTTATTAAGGTAAGGCAATATGATCAGATACTTATAGAAATTTGTGGAAAAAGGGCTATAGGTACAGTGTTAGTAGGACCTACACCTGTCAACATAATTGGACGAAACATGTTGACACAGCTTGGTTGTACTTTAAATTTCCCAATTAGCCCTATTGACACTGTACCAGTAAATCTAAAGCCAGGAATGGATGGCCCAAAGGTTAAACAATGGCCATTGACAAAAGAGAAAATAGAAGCATTAACAGCAATTTGYGAG…
>304126_181115_URF_0107
TGGCAACGACCCCTTGTCACAATAAAAATAGCAGGACAGCTAAAAGAAGCTCTATTAGATACAGGAGCAGATGATACAGTATTAGAAGATATAAATCTGCCAGGAAAATGGAAACCAAAAATGATAGGGGGAATTGGAGGTTTTATCAAGGTAAGGCAATATGATCAGATACTTATAGAAATTTGTGGRAAAAAGGCTATAGGTACAGTATTAGTAGGACCTACACCTGTCAACATAATTGGACGAAATATGTTGACTCAGCTTGGTTGTACTTTAAATTTCCCAATTAGTCCTATTRACACTGTACCAGTAACATTAAAGCCAGGAATGGATGGACCAAAGGTTAAACAATGGCCATTGACAAAAGAGAAAATAGAAGCATTAACAGCAATTTGTGAT…
>302718_160601_URF_0107
TGGCAACGACCCCTTGTTACCATAARGATAGGGGGGCAGTTAAAGGAAGCTCTATTAGATACAGGAGCAGATGATACAGTATTAGAAGACATRGATTTRCCAGGAAAATGGAAACCAAAAATGATAGGGGGAATTGGAGGTTTTATCAAAGTAAGACAGTATGAACARATACCCATAGAAATCTGTGGACATAAAGTTATAGGTACAGTATTARTAGGACCTACACCTGTCAACATAATTGGAAGAAACYTGTTGACTCAGCTTGGTTGTACTTTAAATTTTCCAATCAGTCCTATTGAAACTGTACCAGTAAAACTAAAACCAGGAATGGATGGCCCAAAGGTTAAACAATGGCCATTGACAAAAGARAAAATAGAAGCATTAACAGCAATTTGTGAT…
>304163_181211_URF_02A1
TGGCAACGACCCATAGTCACAGTAAGAATAGGGGAACAACTAATAGAAGCCCTATTAGATACAGGAGCAGATGATACAGTATTAGAAGACATAAATTTACCAGGGAAATGGAAACCAAAAATGATAGGGGGAATTGGAGGTTTTATCAAAGTAAAACAGTATGATCAGATACCTATAGAAATTTGTGGRAAAAAAGCTATAGGTACAGTATTGGTAGGCCCTACACCTGTCAACATAATTGGAAGAAATATGTTGACCCAGATTGGTTGTACTTTAAACCTYCCAATTAGTCCTATTGATACTGTACCAGTAAAATTAAAGCCAGGAATGGATGGCCCAAAGATTAAACAATGGCCATTGACAGAAGAAAAAATAAAAGCCTTAACAGAAATTTGTACA…
>619105_190708_URF_0107
TGGCAACGACCCCTTGTTACCATAAAGATAGGGGGGCAAATAAAGGAAGCTCTATTAGATACAGGAGCAGATGATACAGTATTAGAAGACATGAATTTGCCAGGGAAATGGAAACCAAAAATGATAGGGGGAATTGGAGGTTTTATCAAAGTAAGACAATATGAACAGATACCCATAGAAATCTGTGGACARAAGGCTATAGGTACAGTATTAGTAGGACCTACACCTGTCAACATAATTGGAAGAAATCTGTTGACTCAGCTTGGTTGTACTTTAAATTTTCCAATCAGTCCTATTGAAACTGTACCAGTAAAACTAAAGCCAGGAATGGATGGCCCAAAGGTTAAACAATGGCCATTGACAAAAGAAAAAATARAAGCATTRACAGCAATTTGTGAT…
>111209_191114_URF_0107
TGGCAACGACCCCTTGTTGCAATAAAGATAGGGGGACAATTAAAGGAGGCTCTATTAGATACAGGAGCAGATGATACAGTATTAGAAGACATGAATTTGCCAGGAAAATGGAAACCAAAAATGATAGGGGGAATTGGAGGTTTTATCAAAGTAAGACAGTATGAACAAGTACCCATAGAAATCTGTGGACATAAAGCTATAGGTACAGTATTAGTAGGACCTACACCTGTCAACATAATTGGAAGAAATCTGTTGACTCAGCTTGGCTGCACTTTAAATTTTCCAATCAGTCCTATTGAAACTGTACCAGTAAAATTAAAGCCAGGAATGGATGGCCCAAGAGTTAAACAATGGCCATTGACAAAAGAGAAAATAGAAGCATTAACAGCAATTTGTGAC…
>304058_180911_URF_BC
TGGCAACGACCCATTGTCACAATAAAGATAGGGGGGCARTTAAAGGAAGCTCTCTTAGATACAGGAGCAGATGATACAGTATTAGAAGAAGTAAATTTGCCAGGGAAATGGAAACCAAAAATGATAGGGGGAATTGGAGGTTTTATCAAGGTAAGAGAGTATGAACAAGTAGCCATAGAAATTTGTGGACACAAAACTATAGGTACAGTATTAGTGGGACCTACGCCTGTTAACATAATTGGAAGAAATCTGTTAACTCAGCTTGGCTGCACTTTAAATTTTCCAATCAGTCCCATTGAAACTGTACCAGTAAAATTAAAGCCAGGAATGGATGGCCCAAAGGTTAAACAATGGCCATTGACAGAAGAAAAAATAAAAGCATTAACAGAAATTTGTAAT…
>323141__URF_0107
TGGCAACGACCCCTTGTCACAATAAAAGTAGGGGGACAGATGAGGGAAGCTCTATTAGATACAGGAGCAGATGATACAGTATTAGAAGAYATRAATTTGCCAGGRAAATGGAAACCAAAAATGATAGGGGGAATTGGAGGTTTTATCAARGTAAAGCAATATGATCAGATACYYATAGAAATTTGTGGGAAAAAGGCTATAGGTACAGTATTAGTAGGACCTACACCTGTCAACATAATTGGAAGAAATCTGTTGACTCAGCTTGGTTGTACTTTAAATTTTCCAATCAGTCCTGTTGAAACTGTACCAGTAAAACTAAAGCCAGGAATGGATGGCCCAAAGGTTAAACAATGGCCATTGACAAAAGAAAAAATAGAAGCATTAACAGCAATTTGTGAT…
>083026_160901_URF_BC
TGGCAGCGACCCCTTGTCCCAATAAGAGTAGGGGGTCAGATGAAAGARGCTCTCTTAGACACAGGAGCAGATGATACAGTATTAGAAGAAATAAATTTGCCAGGAAAATGGAAACCAAAAATGATAGGAGGAATTGGAGGTTTTATCAAAGTAAGRCARTATGATCAGATACCCATAGAAATCTGTGGGCACAAAGCTGTAGGTACAGTATTAGTAGGACCAACACCTATCAACATAATTGGAAGAAATCTGTTGACTCAGCTTGGATGCACTCTAAATTTTCCAATAAGTCCTATTGAAACTGTACCAGTGAAATTAAAGCCAGGAATGGATGGCCCAAAGGTTAAACAATGGCCATTGACAGAAGAAAAAATAAAAGCATTAACTGCAATTTGTGAT…
>322038_160315_URF_0107
TGGCAACGACCCCTTGTCACAGTAAAAATAGGAGGACAGCTAAAAGAAGCTCTACTAGATACAGGAGCAGATGATACAGTATTAGAAGATATAGATTTGCCAGGAAAATGGAAACCAAGAATGATAGGGGGAATTGGAGGTTTTATCAAAGTAAGACAGTATGAACAGATACCCTTAGAAATCTGTGGACATAAAGCTATAGGTACAGTATTAGTAGGACCTACACCTGTYAACATAATTGGAAGAAATCTGTTGACTCAGATTGGTTGTACTTTAAAYTTTCCCATTAGTCCTATTGAAACTGTACCAGTACAATTAAAGCCAGGAATGGATGGCCCAAAGGTTAAACAATGGCCATTGACAAAAGAAAAAATAGAAGCATTAACAGCAATTTGTGAT…
>LNA819-1_CRF01AE
TGGCAACGACCCGTTGTCACAGTAAGAATAGAAGGACAGCTGAAAGAAGCTCTATTAGATACAGGAGCAGATGATACAGTATTAGAAGATATAAATTTGCCAGGAAAATGGAAACCAAAAATGATAGGGGGAATTGGAGGTTTTATCAAAGTAAGGCAATATGATCAGATACTTATAGAAATTTGTGGAAAACAGGCTATAGGTACAGTGTTAGTAGGACCTACACCTGTCAACATAATTGGACGAAATATGTTGACTAAGATTGGTTATACTTTAAATTTTCCAATTAGTCCTGTTGACACTGTACCAGTAACATTAAAGCCAGGAATGGATGGGCCAAAAGTCAAACAGTGGCCATTGACAGAAGAAAAAATAAAAGCACTAACAGAAATTTGTAAG…
>LNA819-2_CRF01_AE
TGGCAACGACCCGTTGTCACAGTAAGAATAGAAGGACAGCTGAAAGAAGCTCTATTAGATACAGGAGCAGATGATACAGTATTAGAAGATATAAATTTGCCAGGAAAATGGAAACCAAAAATGATAGGGGGAATTGGAGGTTTTATCAAAGTAAGGCAATATGATCAGATACTTATAGAAATTTGTGGAAAACAGGCTATAGGTACAGTGTTAGTAGGACCTACACCTGTCAACATAATTGGACGAAATATGTTGACTAAGATTGGTTGTACTTTAAATTTTCCAATTAGTCCTGTTGACACTGTACCAGTAACATTAAAGCCAGGAATGGATGGACCAAAGGTCAAACAGTGGCCATTGACAGAAGAAAAAATAAAAGCACTAACAGAAATTTGTAAG…
>LNA819-3_CRF01_AE
TGGCAACGACCCGTTGTTACAGTAAGAATAGAAGGACAGCTGAAAGAAGCTCTATTAGATACAGGGGCAGATGATACAGTATTAGAAGATATAAATTTGCCAGGAAAATGGAAACCAAAAATGATAGGGGGAATTGGAGGTTTTATCAAAGTAAGGCAATATGATCAGATACTTATAGAAATTTGTGGAAAACAGGCTATAGGTACAGTGTTAGTAGGACCTACACCTGTCAACATAATTGGACGAAATATGTTGACTAAGATTGGTTGTACTTTAAATTTTCCAATTAGTCCTGTTGACACTGTACCAGTAACATTAAAGCCAGGAATGGATGGACCAAAGGTCAAACAGTGGCCATTGACAGAAGAAAAAATAAAAGCACTAACAGAAATTTGTAAG…
>LNA819-4_CRF01_AE
TGGCAACGACCCGTTGTCACAGTAAGAATAGAAGGACAGCTGAAAGAAGCTCTATTAGATACAGGRGCAGATGATACAGTATTAGAAGATATAAATTTGCCAGGAAAATGGAAACCAAAAATGATAGGGGGAATTGGAGGTTTTATCAAAGTAAGGCAATATGATCAGATACTTATAGAAATTTGTGGAAAACAGGCTATAGGTACAGTGTTAGTAGGACCTACACCTGTCAACATAATTGGACGAAATATGTTGACTAAGATTGGTTGTACTTTAAATTTTCCAATTAGTCCTGTTGACACTGTACCAGTAACATTAAAGCCAGGAATGGATGGACCAAAGGTCAAACAGTGGCCATTGACAGAAGAAAAAATAAAAGCACTAACAGAAATTTGTAAG…
>LNA819-5_CRF01_AE
TGGCAACGACCCGTTGTCACAGTAAGAATAGAAGGACAGCTGAAAGAAGCTCTCTTAGATACAGGGGCAGATGATACAGTATTAGAAGATATAAATTTGCCAGGAAAATGGAAACCAAAAATGATAGGGGGAATTGGAGGTTTTATCAAAGTAAGGCAATATGATCAGATACTTATAGAAATTTGTGGAAAACAGGCTATAGGTACAGTGTTAGTAGGACCTACACCTGTCAACATAATTGGACGAAATATGTTGACTAAGATTGGTTGTACTTTAAATTTTCCAATCAGTCCTATTGAAACTATACCAGTAAAACTAAAGCCAGGAATGGATGGCCCAAAGGTTAAACAGTGGCCATTGACAGAAGAAAAAATAAAAGCACTAACAGAAATTTGTAAG…
